# Supplementary material for: A Genetic Vaccine Encoding Shared Cancer Neoantigens to Treat Tumors with Microsatellite Instability
Source: Oxford University Press journal article supplement (doi:10.1158/0008-5472.can-20-1072), 2020-07-20
Supplement: 00085472can201072-sup-240540_2_supp_6405217_qd1hgg.xlsx [file 00085472can201072-sup-240540_2_supp_6405217_qd1hgg.xlsx]

## Sheet: Sheet1
Table S1: List of 1087 FSPs suitable for the inclusion in NOUS-209 vaccine. In table is reported the list of 1087 FSPs selected after applying the filtering steps as reported in manuscript. For each FSP is annotated its aminoacidic sequence, the corresponding length in aminoacids, the frequency of observation of encoding FSMs in colorectal (CRC), gastric (GC), endometrial (EC) tumors. In last col…
#	ID	Chromosomic coordinates (GRCh37)	Sequence of FSP	Length	Frequency in CRC	Frequency in GC	Frequency in EC	Selected for NOUS-209
1	FSP_RPL22_1	chr1:6257785	GGKKRSKF	8	0.7	0.79	0.57	Vector 2
2	FSP_ACVR2A_1	chr2:148683686	VHKKRGLF	8	0.97	0.85	0.27	Vector 3
3	FSP_RNF43_1	chr17:56435161	VPPSPPLALGPRMQLCTQLARFFPITPPVWHILGPQRHTP	40	0.57	0.62	0.37	Vector 4
4	FSP_DOCK3_1	chr3:51417604	QPSLPGPCASLLSTLSQPPPQAPSQVWTAATLRCPAVPAAACPP	44	0.62	0.47	0.36	Vector 1
5	FSP_MSH3_1	chr5:79970915	RATFLLALWECSLPQARLCLIVSRTLLLVQS	31	0.62	0.65	0.25	Vector 2
6	FSP_LMAN1_1	chr18:57013194	RNSRRATPTSKGSLRRKYLRV	21	0.55	0.57	0.27	Vector 3
7	FSP_RBM27_1	chr5:145647320	VLKKNRKQ	8	0.52	0.54	0.29	Vector 4
8	FSP_NDUFC2_1	chr11:77784147	TAFFLLDIIL	10	0.55	0.53	0.28	Vector 1
9	FSP_UPF3A_1	chr13:115057211	RQINRRKLQRKK	12	0.51	0.48	0.31	Vector 2
10	FSP_SRPR_1	chr11:126137087	RGPRRKVLMVLWLPANQSLQKSQVFQWVLRTE	32	0.52	0.57	0.25	Vector 3
11	FSP_COBLL1_1	chr2:165551296	CRCRREYRVTM	11	0.55	0.55	0.22	Vector 4
12	FSP_TTK_1	chr6:80751897	GEKNDLQLFVMSDTTYKIYWTVILLNPCGNLHLKTTSL	38	0.58	0.58	0.19	Vector 1
13	FSP_KMT2C_1	chr7:151874148	RNKKTKLWFSLINIHHRKNPLLPMR	25	0.28	0.47	0.31	Vector 2
14	FSP_SETD1B_1	chr12:122242658	TTTTSSPRRSPALRARGGTTIGEVTS	26	0.65	0	0.38	Vector 3
15	FSP_SEC63_1	chr6:108214755	NLHLCYYHSQSNRNKSRQMESLGMKLQ	27	0.57	0.49	0.15	Vector 4
16	FSP_TEAD2_1	chr19:49850473	MPSSWSSSGRT	11	0.44	0.51	0.19	Vector 1
17	FSP_TMEM60_1	chr7:77423460	PGTSLQCYLN	10	0.48	0.42	0.19	Vector 2
18	FSP_UBR5_1	chr8:103289349	KGKNSPCCQKKLRVQNQGHLLMILLHN	27	0.62	0.6	0.04	Vector 3
19	FSP_TBC1D23_1	chr3:100039736	NILNSLPSSMEIAVLQE	17	0.46	0.39	0.17	Vector 4
20	FSP_WDTC1_1	chr1:27621108	NMGGNRSICLT	11	0.3	0.29	0.28	Vector 1
21	FSP_SLC35G2_1	chr3:136573486	ELSLEPWIPYLHQQKTQ	17	0.51	0.48	0.09	Vector 2
22	FSP_JPH4_1	chr14:24040436	EWGGQAHRQRN	11	0.44	0.35	0.17	Vector 4
23	FSP_PRDM2_1	chr1:14108749	FLIHLRKVDTHHLQVVTKTVTATTADGQRMRRLKCKACRLRWARPEPAAQAPPKSHFPPHPSGPSRTSSLQLR	73	0.26	0.58	0.12	Vector 3
24	FSP_TVP23A_1	chr16:10867203	IVFFLAPYFP	10	0.45	0.41	0.12	Vector 1
25	FSP_XPOT_1	chr12:64812755	PKFFLTFSQ	9	0.36	0.35	0.17	Vector 2
26	FSP_XYLT2_1	chr17:48433967	ARQPSRPTGRTPTTRLMAPVGSVMSCSLLTQPSPASACTMPPLLHPQWAPHSAGLSPGACRPACTCISMTTISRATW	77	0.32	0.45	0.13	Vector 3
27	FSP_SMAP1_1	chr6:71508370	RKRKREKRSQKSRQNHLQLKSCRRKISNWSKLRSPWIF	38	0.29	0.15	0.29	Vector 1
28	FSP_BAX_1	chr19:49458971	RHPSWPWTRCLRMRPPRS	18	0.32	0.37	0.17	Vector 2
29	FSP_ARV1_1	chr1:231131567	TAKKSPTSFCC	11	0.46	0.27	0.16	Vector 4
30	FSP_WDR55_1	chr5:140049102	RRKKREDHCGL	11	0.42	0.29	0.16	Vector 2
31	FSP_PHF2_1	chr9:96422612	VSKKRLPKL	9	0.36	0.35	0.16	Vector 1
32	FSP_SLAMF1_1	chr1:160589601	ALRSMPKSRNQVLFRRNLTPSQLRTLAPPYMLLPQSLSQSLSRKQIPSQSMLV	53	0.44	0.28	0.16	Vector 1
33	FSP_ZBTB20_1	chr3:114058003	LQAHPQVPALAPQAWWPARRGPLTSAPSAQQSLT	34	0.36	0.38	0.13	Vector 2
34	FSP_SLC3A2_1	chr11:62649529	RASVSFWTLLPTTGVRTRGSPLRLTLWPPR	30	0.39	0.37	0.13	Vector 4
35	FSP_KCNMA1_1	chr10:78729786	SNGMEACGTHPTPRLS	16	0.46	0.4	0.08	Vector 3
36	FSP_DNA2_1	chr10:70182521	PLFFHGDLC	9	0.48	0.28	0.13	Vector 4
37	FSP_PHACTR4_1	chr1:28785730	VVINLKRLQKF	11	0.25	0.35	0.19	Vector 4
38	FSP_SGOL1_1	chr3:20216050	CTNLSVPMMLTILIWKRVFILLLSDKK	27	0.51	0.22	0.14	Vector 3
39	FSP_KIAA1024_1	chr15:79750586	ASSPGHPLGP	10	0.36	0.32	0.13	Vector 1
40	FSP_EIF2B3_1	chr1:45407182	QWSSVTSLEWTAQERGCSSWLMKQTWMKSWSLRDPSYRSILEYVSTRVLWMPTSTV	56	0.35	0.32	0.13	Vector 2
41	FSP_RGS12_1	chr4:3430399	NIRKLIWTKQRSFLSLFPKLRATEQMTNVGC	31	0.42	0.33	0.09	Vector 3
42	FSP_ABCC5_1	chr3:183665257	CLRVRCGGWLCGWTPRG	17	0.41	0.28	0.13	Vector 3
43	FSP_TCERG1_1	chr5:145886723	RESTLGNFWMKLLQLP	16	0.44	0.35	0.07	Vector 4
44	FSP_NBEAL1_1	chr2:203922058	RRKWQIRHVLKNL	13	0.48	0	0.23	Vector 2
45	FSP_GRB14_1	chr2:165365288	NMEHRLTMDSALSLTKREGPET	22	0.38	0.27	0.11	Vector 3
46	FSP_ASH1L_1	chr1:155308000	QRKVVKNPSQPVPLRNDGITNGNDSTRSCSISLKKSLEKMPLM	43	0.29	0.28	0.14	Vector 1
47	FSP_EPHB2_1	chr1:23240246	REWEKRKQILGGGGKYKEYFLKRILIRKAMTVLAGDKKGLGRFMRCVQSETKAVSLQLPLGR	62	0.46	0.19	0.11	Vector 3
48	FSP_CD3G_1	chr11:118220583	NGIWEVMPRTLEGCISVKDHRTSQNHSKCITECVRTALN	39	0.35	0.18	0.17	Vector 1
49	FSP_TNKS2_1	chr10:93601946	TGMEILLWILLKMEIQIFKICLGEMQLC	28	0.36	0.26	0.13	Vector 4
50	FSP_CCDC28A_1	chr6:139097330	NAKKMPFQ	8	0.32	0.26	0.13	Vector 4
51	FSP_AKAP7_1	chr6:131481276	REKIINPTISCPFQSPTKRL	20	0.36	0.33	0.07	Vector 2
52	FSP_PRRG1_1	chrX:37312611	HQMKCLTAVDCLQAFWDM	18	0.22	0.17	0.25	Vector 3
53	FSP_MNS1_1	chr15:56736723	QEKKSRKLMSSC	12	0.19	0.28	0.19	Vector 2
54	FSP_TTC3_1	chr21:38524243	IQKKKQKS	8	0.35	0.22	0.12	Vector 4
55	FSP_ZDBF2_1	chr2:207174428	ADKKNVRS	8	0.26	0.34	0.09	Vector 1
56	FSP_CDC7_1	chr1:91967357	TSRILNLQVLKKILRSFMKLYHSLVMCLRLRTKLEKALSALFIWPQHSYK	50	0.36	0.28	0.1	Vector 4
57	FSP_ADD3_1	chr10:111893350	KNKKRRKLRPK	11	0.25	0.31	0.14	Vector 3
58	FSP_MIS18BP1_1	chr14:45693722	CQKKVPSASPWGL	13	0.3	0.25	0.13	Vector 4
59	FSP_RAD50_1	chr5:131931452	RKSGVMKCWDLCP	13	0.28	0.31	0.1	Vector 3
60	FSP_ADNP_1	chr20:49508204	RLPCKVTESS	10	0.32	0.29	0.11	Vector 1
61	FSP_USP35_1	chr11:77920856	PACTSKAWTPRKLVGRAVRRKG	22	0.35	0.09	0.16	Vector 4
62	FSP_SYNJ2_1	chr6:158508009	QRPPLQPV	8	0.13	0.39	0.12	Vector 4
63	FSP_LARP4B_1	chr10:890939	HWNSAYLGRTLLVTCILYHRWIVTSMCQSQRWLTSTTSRSSALMWT	46	0.3	0.29	0.06	Vector 2
64	FSP_BMPR2_1	chr2:203420130	TEIQLTMNDSKHKLESPALKQVSPASPPTQQPQTPQDSRQVLA	43	0.51	0.24	0.04	Vector 1
65	FSP_RBM45_1	chr2:178988920	CKKKLLLKLL	10	0.33	0.28	0.09	Vector 3
66	FSP_EBPL_1	chr13:50235209	YLFFLTVCGF	10	0.3	0.19	0.1	Vector 3
67	FSP_PRR11_1	chr17:57247171	FKKKKPLTFSPS	12	0.23	0.28	0.1	Vector 1
68	FSP_JAK1_1	chr1:65306997	NQQLKWTPHILKSAS	15	0.07	0.13	0.26	Vector 1
69	FSP_MYO1A_1	chr12:57422573	RYKKRGVIAWR	11	0.33	0.44	0.17	Vector 2
70	FSP_ATR_1	chr3:142274740	LKKKYLVQ	8	0.22	0.32	0.08	Vector 3
71	FSP_KNOP1_1	chr16:19725706	STRREMPSQATPSPPGPWRAALGKEVKRSQSKLRLRNTSP	40	0.23	0.31	0.08	Vector 1
72	FSP_CCDC43_1	chr17:42756253	GHREGSESDNLGLLYSFPP	19	0.3	0.22	0.1	Vector 2
73	FSP_ARID1A_1	chr1:27105931	TPLSISRPTSRARQSCCLPGLTHPAHQPLGSM	32	0.12	0.27	0.1	Vector 1
74	FSP_VCP_1	chr9:35059647	MCSSLALPTGLTSLILPSSDLAVLISSSTSHFLMRSPVLPSSRLTCASPQLPRMWTWSSWLK	62	0.41	0.31	0.05	Vector 4
75	FSP_VEPH1_1	chr3:157081227	HLKKTSAK	8	0.39	0.22	0.05	Vector 3
76	FSP_SPAG9_1	chr17:49077041	GQAFGSFSADFSAPQ	15	0.28	0.2	0.1	Vector 4
77	FSP_SPAG9_2	chr17:49077041	GQAFGSLCQLVSADFSAPQVTRLRSLNHLLI	31	0.28	0.2	0.1	Vector 4
78	FSP_LRRIQ3_1	chr1:74575213	NSRKKLLEDMKQNGFT	16	0.3	0.14	0.07	Vector 2
79	FSP_ZNF609_1	chr15:64967247	RRNLQRNLKVL	11	0.1	0.29	0.11	Vector 3
80	FSP_CCDC18_1	chr1:93667516	WLKNWKRFKLKKKY	14	0.3	0.22	0.1	Vector 4
81	FSP_PLEKHA6_1	chr1:204228411	YPRLKTFGVPLGSILCLAGSLSTMMIISTTRQECGRRASVPCRPMIGSARPGPWRTSAMPSAMGVALPTSCESGRSPPATGGRMPGSQSIMMSWMPPLAPCAACPCSPAPTLCPAHPARAPTAVPAFTPLSAHPVPVLSGCHLAVRTSMLTLLPM	155	0.26	0.22	0.09	Vector 1
82	FSP_ATAD2_1	chr8:124384893	DKKKKSTEKTK	11	0.29	0.2	0.09	Vector 4
83	FSP_SPECC1_1	chr17:20108263	TYMEMHYGHQAPQVAMLPKLLCRQMLPTLSTLQQRHPQGPCPPPVTPLRVQSVLLLGVPQTA	62	0.19	0.32	0.09	Vector 3
84	FSP_BCORL1_1	chrX:129190011	QAPLRLWSWCGTSQTYFGS	19	0.19	0.2	0.14	Vector 4
85	FSP_CHRM3_1	chr1:240072444	RGASSSTSRDSRSFFTSAHPSRPCRMRLYQ	30	0.19	0.27	0.1	Vector 3
86	FSP_QKI_1	chr6:163899920	RRSKIEASPIGSI	13	0.26	0.22	0.11	Vector 1
87	FSP_SPEF2_1	chr5:35705894	IAKKRIKLRRN	11	0.33	0.18	0.07	Vector 1
88	FSP_NRIP1_1	chr21:16338330	SEKKRKLP	8	0.17	0.21	0.11	Vector 3
89	FSP_CHD3_1	chr17:7798765	VLFKADQSESSLSSG	15	0.15	0.13	0.2	Vector 2
90	FSP_CAMTA2_1	chr17:4875738	GSPPLHLCQPLR	12	0.19	0.13	0.11	Vector 2
91	FSP_SREK1IP1_1	chr5:64023941	GKGLTHPVPLKRTLQNKRNKNIKRVNQKKGNIKRKSILLHLIVLNSPESN	50	0.35	0.08	0.14	Vector 2
92	FSP_TM9SF3_1	chr10:98336475	VSVITMKLWEKHFKGLNWNLVVWILNLKMM	30	0.33	0.29	0.05	Vector 3
93	FSP_ZMYM4_1	chr1:35846960	ELKKNLLLP	9	0.17	0.22	0.1	Vector 4
94	FSP_FHOD3_1	chr18:34205516	VGAGTGGGPACVPVAEASTGAWTAEGAAGTRCRASRAPCRQLPASSPTKCEICVKRRRRRKRSSQSRSPVPKKRERMMLPVRARTARSALPQGRAPLEGMLLPRALPSLLSRMPARRESRFWLALQALGLRPPHLPSCHPLPQLLGPPPPHQAP	154	0.22	0.28	0.07	Vector 1
95	FSP_FHOD3_2	chr18:34205516	TKCEICVKNTAILAITLITPQDPHLDPVCHPHRRPGWKGHHRVVFSHHPSGSTKSHWQQRERGGGRREKKGCRE	74	0.22	0.28	0.07	Vector 1
96	FSP_ZNF106_1	chr15:42742957	PLENTQIPRTSPLWKITMVLTYPNCVVHVLMF	32	0.22	0.18	0.11	Vector 2
97	FSP_ZFP37_1	chr9:115806416	IICIKNMFLQRKGFLNLSHVEKF	23	0.19	0.14	0.06	Vector 4
98	FSP_GBP3_1	chr1:89473442	LKKKPRDICRIS	12	0.45	0.14	0.08	Vector 4
99	FSP_AP1S1_1	chr7:100802405	MSRTPPRRVC	10	0.1	0.15	0.13	Vector 2
100	FSP_ICA1_1	chr7:8198251	LAKKTLTN	8	0.22	0.19	0.08	Vector 1
101	FSP_WBP1_1	chr2:74687410	TPPPLILWPQAAP	13	0.16	0.12	0.13	Vector 3
102	FSP_COIL_1	chr17:55028016	RLRIPSLRKYRQ	12	0.17	0.2	0.06	Vector 3
103	FSP_WDR47_1	chr1:109560141	FDKKGFVILS	10	0.19	0.15	0.06	Vector 1
104	FSP_THAP5_1	chr7:108205526	NPRRKTWKMRKKYAQKPSQKNHLY	24	0.44	0	0.12	Vector 2
105	FSP_DAZAP1_1	chr19:1430254	RHPHRSPPTSCPPLLEAFPLPRASLRATVPRHSSVLATGLHLHRQISLPLRGFLLHQPLPGQHLWLSHRLRLRLPRT	77	0.07	0.12	0.11	Vector 1
106	FSP_GLTSCR1_1	chr19:48197891	AAPPHRLLGPSRW	13	0.23	0.13	0.14	Vector 2
107	FSP_RYR2_1	chr1:237969494	LPLTFSTLLWDSRH	14	0.32	0.18	0.1	Vector 3
108	FSP_PARP14_1	chr3:122433232	ITHPFASQPLGQEMPNNTQIRLLKP	25	0.23	0.2	0.07	Vector 4
109	FSP_STAMBPL1_1	chr10:90682146	RAFIHTPRSPGCSVYANMCW	20	0.28	0.26	0.07	Vector 2
110	FSP_TCEB3_1	chr1:24078404	MTLKALVKTWTQFRNYPR	18	0.15	0.21	0.05	Vector 1
111	FSP_GLYR1_1	chr16:4862229	AFWKPPSQGISSCLMTGCW	19	0.07	0.15	0.08	Vector 2
112	FSP_GART_1	chr21:34882122	FEKKRPEWLS	10	0.15	0.25	0.12	Vector 3
113	FSP_ZNF365_1	chr10:64159513	MAKKSQQPL	9	0.3	0.18	0.07	Vector 4
114	FSP_OFD1_1	chrX:13764946	EAKKSMKRS	9	0.17	0.09	0.13	Vector 1
115	FSP_SPINK5_1	chr5:147499875	RKRMKTGAIQEKGAIQEKGAMTKRICVVNFEACREMESLSAPEKITLFEAHMARCTSINVLCVRASLIEKLMKEKRKMKRNQVASPQIMQRLFIKGYQNNHFTFHLQNFAFFSSFGNNKYINILT	125	0.23	0.11	0.14	Vector 2
116	FSP_SPINK5_2	chr5:147499875	ASPQIMQRMSAVNFETI	17	0.23	0.11	0.14	Vector 2
117	FSP_SPINK5_3	chr5:147499875	ASPQIMQRTSADRFRMKRRMQNLDNLGVPWPLLPG	35	0.23	0.11	0.14	Vector 2
118	FSP_INPPL1_2	chr11:71948748	GDCPRTMAGPSASLHPASGRASRKTWQRRLRACRAGGPAGWARQA	45	0.06	0.07	0.14	Vector 1
119	FSP_DYNC1I2_1	chr2:172549339	GEKLKHCFKAWG	12	0.32	0.13	0.08	Vector 3
120	FSP_CEBPZ_1	chr2:37454908	MLNQKCLAPF	10	0.22	0.15	0.08	Vector 4
121	FSP_NIPBL_1	chr5:36985083	SLILSFQRVK	10	0.16	0.21	0.07	Vector 4
122	FSP_F8_1	chrX:154157686	GAKKITFL	8	0.15	0.13	0.08	Vector 3
123	FSP_SVIL_1	chr10:29760116	WWCTRGGGKRKKKMCKVSGGCTACVERCPWKGICWKWPVTVAA	43	0.28	0.17	0.08	Vector 2
124	FSP_ULK4_1	chr3:41860985	RTLESAGLFPWLHTQC	16	0.17	0.25	0.08	Vector 2
125	FSP_KDM5A_1	chr12:416953	SQKKDPAGKLKK	12	0.22	0.14	0.07	Vector 3
126	FSP_NES_1	chr1:156642804	PIPPHLRHPLLL	12	0.13	0.08	0.09	Vector 3
127	FSP_CPEB2_1	chr4:15067858	VPMSLACSITVSFVGQISTLVLDVSSISHW	30	0.17	0.15	0.07	Vector 1
128	FSP_FAM214A_1	chr15:52901069	DSKKMTQK	8	0.2	0.13	0.05	Vector 4
129	FSP_MDN1_1	chr6:90432675	RSLLYSRMCLVQIPTHTWEPDYFVSLPMMFSWATQSFPVGAVFLTRPAIPCCSCTSHSNPWSQS	64	0.23	0.21	0.09	Vector 1
130	FSP_ARSJ_1	chr4:114823494	RRRNSRKQSQVQLAIQVLLVDKHKYFLFG	29	0.25	0.18	0.09	Vector 2
131	FSP_NFASC_1	chr1:204924033	RLDFHPRSSSG	11	0.17	0.17	0.06	Vector 3
132	FSP_DNAH7_1	chr2:196788374	ILAMTLTLNG	10	0.16	0.2	0.07	Vector 4
133	FSP_C6orf89_1	chr6:36867371	QRPPRSILSL	10	0.15	0.09	0.08	Vector 1
134	FSP_KNOP1_2	chr16:19722724	LEKKATWMRRT	11	0.1	0.11	0.05	Vector 2
135	FSP_CARD11_1	chr7:2968323	GAAAASCQSPPSPRETTPSSDATRRTRPIAAQSKKTMTAAGLTP	44	0.15	0.14	0.05	Vector 3
136	FSP_PROM1_1	chr4:15995680	IEALTALFTCRTASISVNISTLMSILEA	28	0.12	0.17	0.07	Vector 4
137	FSP_MAPRE3_1	chr2:27248517	AFSGRILHQPEMAAMRLMPKFLNSTNSWWT	30	0.25	0.17	0.05	Vector 3
138	FSP_CCDC73_1	chr11:32635951	ILFHVRNIVYGIQVMLC	17	0.28	0.2	0.05	Vector 2
139	FSP_KIAA2026_1	chr9:5968044	QNTRSTNLEKNPSLKKQSQRRGKLS	25	0.22	0.02	0.09	Vector 3
140	FSP_CD4_1	chr12:6924043	RPSPCLSWSSRIVAPGHALSCRTRRRWSSK	30	0.07	0.09	0.07	Vector 4
141	FSP_HMMR_1	chr5:162917426	NKVRQNFKRN	10	0.32	0.28	0.08	Vector 1
142	FSP_ATP6V1B1_1	chr2:71191573	IYPPSTCSLPCRG	13	0.16	0.15	0.07	Vector 2
143	FSP_BRSK1_1	chr19:55815036	VDPPGSVWILPC	12	0.15	0.15	0.07	Vector 3
144	FSP_NBEA_1	chr13:35733663	IIKKMKKRIMVH	12	0.17	0.09	0.07	Vector 4
145	FSP_MESDC2_1	chr15:81271633	KGKKRRKEI	9	0.07	0.19	0.08	Vector 1
146	FSP_PIGB_1	chr15:55631503	LANGLWFNLIF	11	0.15	0.02	0.08	Vector 2
147	FSP_BCL9_1	chr1:147091501	RGPPLHTR	8	0.16	0.22	0.02	Vector 3
148	FSP_TMEM97_1	chr17:26653807	NEGNNHWPRVEMPTGWLLVGYNTRNTAQNPRLQQHLKHWQQCTRARWCQEPCQTLTFFHFFFFFKTVSLCCPGWSKGQPPPPGLKPSSLASQVARTTGVYQHVWLICFVFFVCVETGFCHVAQVGLERLVSLSGITDVNHWAQPKPSPSKGTGMNRPIGLRVGKGVWARL	170	0.19	0.25	0.08	Vector 4
149	FSP_ZBTB7C_1	chr18:45567076	RRMTRRTMTTTKMMMMRRTKRRRRKRRRMTMMTRRTLLTKKTCLTPRTSAATKALPRQTISQRRPIQTPPGTSLAIWG	78	0.06	0.11	0.06	Vector 1
150	FSP_CWF19L2_1	chr11:107325228	RARNRNMKKTMSHLIAHQALKMSGLRLFHPRLLTRKKPGK	40	0.19	0	0.07	Vector 2
151	FSP_BRD3_1	chr9:136918529	RRARPTSCSTCRMWW	15	0.23	0.18	0.16	Vector 1
152	FSP_FAHD2B_1	chr2:97749725	QVSVYSGNLLSFSRRGMKSSVRLKN	25	0.19	0.07	0.07	Vector 3
153	FSP_RFX5_1	chr1:151318741	QVVLRLGNLPPFFRGSEVPFPRPCRTK	27	0.15	0.11	0.02	Vector 4
154	FSP_ATF5_1	chr19:50434211	WLPMRSLGEPWRAGFQWGESPWQVMASLTG	30	0.09	0.01	0.06	Vector 2
155	FSP_C9orf114_1	chr9:131591120	EEKKNGRISS	10	0.17	0.22	0.05	Vector 4
156	FSP_CEP290_1	chr12:88524079	TMSLSNILMKFRL	13	0.15	0.14	0.04	Vector 3
157	FSP_SMAD7_1	chr18:46474795	RWIFSNQLTVQMLCLP	16	0.03	0.05	0.14	Vector 4
158	FSP_SMAD7_2	chr18:46474795	LLTPDTRWIFSNQLQTVQMLCLPPLKQGERIIWPLGGFQIPNFFWSLGIGHTGAWWHTGRRRREWGGSTVSRSPLWISSMIYLRGMAFASDSSIRTTRVSWCRRCGAKSAAASS	114	0.03	0.05	0.14	Vector 4
159	FSP_FXR1_1	chr3:180666228	IPSLNAQWMFLRI	13	0.26	0.12	0.09	Vector 2
160	FSP_PLEKHA7_1	chr11:16822525	SRRNRRYRKIYGELKMSLQA	20	0.12	0.12	0.05	Vector 3
161	FSP_TCF25_1	chr16:89951020	NRKTRKAAREKHRKTD	16	0.17	0.13	0.05	Vector 4
162	FSP_SALL4_1	chr20:50400983	FLPSRFPWGPPPL	13	0	0.09	0.1	Vector 2
163	FSP_SLC9A4_1	chr2:103149137	NSVIVHKIVLVFLKSLSSYNCERRISGIQKRAIEFAVLKLLNMDL	45	0.23	0.2	0.07	Vector 2
164	FSP_ADAMTSL4_1	chr1:150530506	VAPRCPRSAVDISPGPTSPSLASCASVAIGKLALLGASAPCGAAGAREAGRFAVLGTMVMK	61	0.15	0.12	0.05	Vector 3
165	FSP_DPAGT1_1	chr11:118969143	SPLWDCSTTTGTHHGCLWEIPSVTLLA	27	0.23	0.13	0.07	Vector 4
166	FSP_IGF2R_1	chr6:160485488	TLAIRFISAPQPSSSTVTAAPSGQYF	26	0.16	0.17	0.05	Vector 1
167	FSP_TMEM57_1	chr1:25775375	LLLAHMYGFSTYGTQKGECVCLQCLSGSSLFILKQPLDLKISKTFM	46	0.13	0.12	0.04	Vector 2
168	FSP_OR51E2_1	chr11:4703475	SLFFSHCLC	9	0.23	0.31	0.08	Vector 3
169	FSP_UVRAG_1	chr11:75694431	LKKKVNACS	9	0.26	0.15	0.14	Vector 4
170	FSP_SBNO1_1	chr12:123794283	NAKKMEDMIWES	12	0.19	0.14	0.08	Vector 1
171	FSP_JARID2_1	chr6:15496722	GSCGRACSCGRGCGTPRGDWKRHPPRR	27	0.04	0.19	0	Vector 2
172	FSP_OSBPL1A_2	chr18:21750331	MIRKIQKRRRTANR	14	0.07	0.11	0.08	Vector 3
173	FSP_PAX6_1	chr11:31812317	TYTPHICRHT	10	0.15	0.15	0.09	Vector 4
174	FSP_DNAH12_1	chr3:57509313	MKKKDSTIFI	10	0.28	0.19	0.08	Vector 1
175	FSP_ZMPSTE24_1	chr1:40756543	LCFFYLLY	8	0.17	0.14	0.05	Vector 3
176	FSP_CANX_1	chr5:179149920	LTTLSFVLIEE	11	0.13	0.11	0.03	Vector 3
177	FSP_PDS5B_1	chr13:33344580	NLDLQHQRRRKKKKDKVEIRNRSPKANSTECQGEHSREQNLLNLVQLNPHSPHHRKDEEDHQKRHHHHNQKKMSV	75	0.22	0.14	0.05	Vector 4
178	FSP_ADAMTSL1_1	chr9:18680350	ASRAGQFPVWRRTSRGMSLQWKSGNACTPLRCPSRSPATFLTALNGWHRSGLRAQ	55	0.06	0.13	0.05	Vector 1
179	FSP_PSME4_1	chr2:54093345	PYPISEGLTMTTGRNINSNSLMTNCLFSPIFLCHHAIMHRKMTSPHFRLFSSKIPHPQVPSVVALCKF	68	0.09	0.14	0.05	Vector 2
180	FSP_RFC3_1	chr13:34398063	LKLAPLQVTTTLKLILVMLEIVTE	24	0.26	0.05	0.1	Vector 1
181	FSP_NSD1_1	chr5:176675269	CRVNAVEELHSRRMSVRIVKNWVSCCYVRLSAVGLSTWSALD	42	0.01	0.06	0.08	Vector 4
182	FSP_WASF3_1	chr13:27255387	RLPLRPQRGPRPLHRWLQQTTGCSQRR	27	0.1	0.14	0.05	Vector 1
183	FSP_BEND5_1	chr1:49201967	RKMQSLNHPSRLTN	14	0.22	0.19	0.05	Vector 2
184	FSP_C11orf57_1	chr11:111953289	SRKKGHTKNRRKAKRKPQI	19	0.16	0.14	0.05	Vector 3
185	FSP_USP40_1	chr2:234394237	NKIICKGHRIT	11	0.2	0.08	0.07	Vector 4
186	FSP_HIAT1_1	chr1:100534122	SSFFYTSDR	9	0.22	0.11	0.09	Vector 1
187	FSP_LRPPRC_1	chr2:44145165	QKKGHMIFS	9	0.17	0.09	0.06	Vector 2
188	FSP_STAU2_1	chr8:74507471	MLQKQCCYNLVIKHPLIFRINLRRQGKTKDGVVQSLGFLNQQIILQKEFFICLLMFIKRWKPAATK	66	0.26	0.21	0.08	Vector 3
189	FSP_INPPL1_1	chr11:71948209	HPRTASITLPTTSLKGSRTSCCPRSHPRLPRTKWPLQCLLHSLGTTGTLVWERGVLQMRSLEAHCPLQTFHLHHCRTQPSSCPPAWILYQGQWSGAVVGLRPVAHHLPRPIQGLHCPQAPHQPALSWGKWPVGMTGPARCCRWPRR	146	0	0.08	0.07	Vector 4
190	FSP_CD93_1	chr20:23066469	RTRLTLTGTRSSGTRASPSAVCLCCWTCPSRSFPAASPSGLRAPVGAQAPPEVTLRASCASSASKACAGLWPWGAQVR	78	0.12	0.08	0.05	Vector 1
191	FSP_WNK4_1	chr17:40939870	CHPAWLSPISACPRLLPYPFHVLALEVTFPPGTAMPQMQLQALAMWEKGWDK	52	0.15	0.12	0.08	Vector 2
192	FSP_TNRC6C_1	chr17:76046980	MDLDGMLTVIGQGLVGMTPRDLGTVAGATAQIQRPIQVQTGGRL	44	0.17	0.2	0.05	Vector 3
193	FSP_KIF24_1	chr9:34257623	SQKSQHHCALRKIEWATKLSLGGKAGPQAQEKA	33	0.19	0.15	0.04	Vector 4
194	FSP_ATP11B_1	chr3:182602674	IRMCALSHPSFYISSTVCFLSKHCMTACT	29	0.09	0.06	0.05	Vector 2
195	FSP_CKAP2_1	chr13:53049034	RCSLMEQIPHLKS	13	0.28	0.19	0.04	Vector 2
196	FSP_KCTD16_1	chr5:143853531	LLKKSSQLRRSWRNVSRIS	19	0.32	0.28	0.05	Vector 3
197	FSP_ZC3H11A_1	chr1:203786225	SIPHVPKATAAHSVTVKLQ	19	0.16	0.07	0.01	Vector 3
198	FSP_ANKIB1_1	chr7:91936914	THPCTMLLPQG	11	0.12	0.14	0.05	Vector 2
199	FSP_MYO16_1	chr13:109661386	SRSHLDFSPYWMKKVK	16	0.12	0.12	0.05	Vector 2
200	FSP_CCDC181_1	chr1:169366580	WLKKSTKSR	9	0.23	0.13	0.07	Vector 3
201	FSP_ASCC3_1	chr6:101296336	DRVFLVKI	8	0.15	0.18	0.01	Vector 3
202	FSP_LRRC17_1	chr7:102584993	NIEITPQRSKA	11	0.1	0.13	0.05	Vector 3
203	FSP_MXRA8_1	chr1:1290110	GALRATAPATAAPQAQTPHWRAATTSSMSSSPRAEPTSSSSWATCWPRCCSSSCYWSLSSWPPAGAAEATNTRTRSRESQRGRMLTWRSSLWLQGTRCFTGVRTSS	106	0.17	0.19	0.01	Vector 2
204	FSP_ROBO2_1	chr3:77657038	QSSPFLARSWNTMQWNNKKMAMTVIAGAHHCQYKLTYTKVWKMNWKKMMIGSQHLLFSPLDSSPLQLLLHPHGKRCNPCCRLTWMS	86	0.16	0.09	0.05	Vector 3
205	FSP_C7orf50_1	chr7:1037311	CRGGPSASDRCCSCSPSGFSAGRGRCPVQGCLRPHRVQLLRRWGPGSPAGQRLSKGFQLLRWWGPGSPAPEPRKGPFPPPDPPWPVTAVTVMAGSVPSAQSVDALESPGPLALEGPSSPRNLLWREMSIFLPGIF	135	0.1	0.11	0.03	Vector 4
206	FSP_SCAF4_2	chr21:33073336	HLNRKLHLTRSCLIDLTMMMSQKLWKNQRKRIPLPSPRQHLLPQYPLHPPPPCLLLLHHRHHLAFLEMACSSQHTHSIKIWISFSHE	87	0.09	0.06	0.08	Vector 3
207	FSP_CEP76_1;FSP_CEP76_2	chr18:12699829	LILIQHGGIFTFRFWVEKLSWNICKNLSLYLDKFVQRLLYVYIIETNVFVLNLFHVPVNQIFMMAFYLKYTEKAWVMELEWLIQQQCYQ	89	0.12	0.02	0.06	Vector 2
208	FSP_ZNF563_1	chr19:12430217	GPVYYVCNRMNVSSVLKPFLFTVPIEDMRECTLGRNRMNVSSVLKPCLIPVPI	53	0.13	0.07	0.06	Vector 3
209	FSP_TFE3_1	chrX:48887952	DLPRMLPISSPLHRPQMPFWTCTFPATTWGTWETPSTWGWRTF	43	0.17	0.08	0.05	Vector 3
210	FSP_RAPGEF6_1	chr5:130815369	VIAILSSMCQEILNRHHRRKEVRKLKQILFQVEETKSGRFWIKHDLVSCLQSYLVMEA	58	0.19	0.08	0.03
211	FSP_ARFGAP2_1	chr11:47196853	WLGMALIFG	9	0.04	0.22	0.05
212	FSP_ARFGAP2_2	chr11:47196853	ANMDAQPMMPTPNIIAELPRCTGRRSGSWGVRPWLGMALIPLPGMRQPLSLQGPSSQPRLQRAVAWHSRSMAPTQTCLAPHPKPHWN	87	0.04	0.22	0.05
213	FSP_ACVR2A_2	chr2:148657041	TALKYIFVAVRAICVMKSFLIFRRWKSHSPLQIQLHLSHPITTSCSIPWCHLC	53	0.07	0.15	0.04
214	FSP_PPP2R3B_1	chrX:302052	HRPASSTGSAAWTWTGTAPCPCSSAEGWTAWPSRPCPSRTASARCWTWSSRGLKGRSRCRT	61	0.07	0.09	0.03
215	FSP_TTK_2	chr6:80751910	NDLQLFVMSDTTYKIYWTVILLNPCGNLHLKTTSL	35	0.12	0.12	0.05
216	FSP_WRN_1	chr8:31001132	VSWYSHQKKLTVPHSLLFRHKSRRLRLCYMANW	33	0.03	0.06	0.04
217	FSP_ZCCHC6_1	chr9:88937823	VNLSSPKASLLR	12	0.06	0.05	0.02
218	FSP_ZCCHC6_2	chr9:88937823	MNSVNLSSPKARDWTVSELLKN	22	0.06	0.05	0.02
219	FSP_SLC25A24_1	chr1:108700183	NPDNGGGSFWQEALLVLWTV	20	0.09	0.05	0.04
220	FSP_CTCF_1	chr16:67645339	QRKPKRANCVIQRRAKM	17	0.03	0.05	0.07
221	FSP_RUFY2_1	chr10:70156583	MQKKWPITYVA	11	0.19	0.08	0.04
222	FSP_ROM1_1	chr11:62381084	GGGGSWSSPSG	11	0.06	0.15	0.05
223	FSP_UFL1_1	chr6:96999786	GKDRYCSNIDKHWLNS	16	0.09	0.02	0.04
224	FSP_HLA-B_1	chr6:31323363	RADPQRHT	8	0.15	0.05	0.01
225	FSP_MYH15_1	chr3:108229398	RAFFGGLL	8	0.04	0.06	0.03
226	FSP_P4HB_1	chr17:79803764	TSLWSSMPHGVVTANSWLPFGINWERRTRTMRTSSSPRWTRLPTRWRPSKCTASPHSSSFLPVPTGRSLITTGNARWMVLRNSWRAVARMGQGMMTISRTWKKQRSQTWRKTMIRKL	117	0.07	0.12	0.03
227	FSP_TCF20_1	chr22:42564716	CRTRPRKAASAQSSRSGGEGGSVLVGMERTASTGETVEMRRWWTLVMEWKSSYRAATPCPAPPRPARVPAHASTSLSSHITLKPVTPQERKTQDVGMAVSMDTISIVTMWGEGGGVG	117	0.03	0.05	0.05
228	FSP_ASXL1_1	chr20:31022442	VARVEVAAGPPMREVAEAAAVVMVVRPVATLSPGEARAPLESVRQIYSEHNYCRLIL	57	0.1	0.05	0.07
229	FSP_ZDBF2_2	chr2:207174869	RLPGLTCKVRRTLHQLKLCQRVMILSVVFQILMTCQWP	38	0.13	0.12	0.04
230	FSP_DHX36_1	chr3:154032978	CLESGTDHILTEILSISCKKMNQMEL	26	0.12	0.13	0.05
231	FSP_WDR78_1	chr1:67390426	RGGAPLPSWSPPCQSLRQAVTSSRTSG	27	0.06	0.09	0.02
232	FSP_GINS1_1	chr20:25422397	IASTFYLDGNVSS	13	0.15	0.18	0.05
233	FSP_PRRT2_1	chr16:29825016	ECCSSWLRRIE	11	0.25	0.11	0.05
234	FSP_SCAF4_1	chr21:33074655	MECSKLKLFNLFWTWQREPVMQPQ	24	0.04	0.07	0.03
235	FSP_MYO6_1	chr6:76599858	LQKKNSRKRKQKG	13	0.13	0.08	0.03
236	FSP_DDX39B_1	chr6:31504446	LVVCLSRRMKRC	12	0.12	0.12	0.02
237	FSP_CASD1_2	chr7:94185017	VDSSSYHPFKINQNIRFQKF	20	0.01	0.09	0.02
238	FSP_PARD3B_1	chr2:206166298	RKRRRRKRKRAN	12	0.06	0.09	0.04
239	FSP_ZNF514_1	chr2:95815035	PYKFSEYRRAFSWSADITGT	20	0.03	0.07	0.01
240	FSP_ABCA6_1	chr17:67125767	ILFFYMAYLW	10	0.07	0.09	0.04
241	FSP_ANK3_1	chr10:61823946	NGLPETEKMPQLMP	14	0.03	0.07	0.03
242	FSP_NOSTRIN_1	chr2:169699563	YYQKTWRVILPD	12	0.06	0.07	0.03
243	FSP_DDC_1	chr7:50531075	STWFHVTSGTSLSCALPSVLARWNLPMCSGPGNTSKSWRPTCCEQRGSRSEASCRNQKLKRDISENWNKKQINIILPSWNSAVCGFPCLSPKLSRGL	97	0.04	0.11	0.02
244	FSP_ARID1A_2	chr1:27106804	SAAWRSCIALWCASSVTERTRCAGRWLWYCWPTWLRGTAWQLVPLQCRRAVSATSWAS	58	0.07	0.09	0.04
245	FSP_PMEPA1_1	chr20:56227349	AVTRASAPRATAAAGAWRGRRPPTARSSATTRGPPSSTSRAVGRPPCWRGPGSTTHTSRP	60	0.03	0.09	0.04
246	FSP_SYCP2_1	chr20:58452519	TIKISQIQNQSVNKNFHIHLKRTYQ	25	0.25	0.15	0.05
247	FSP_VPS33A_1	chr12:122720397	AETITQLYGKHYASGWMMLMSKTPRTYRMCTVGMPRSVCGWPSCFPGLAGSSQGPTLRSGSHCPQDCRRNVNREKTE	77	0.12	0	0.02
248	FSP_NOS3_1	chr7:150698398	AALQTGPGSCPPSRAASLLFSIRRWSTISCPRPSATSQTPGRGVPPRAPASPGRRPLKKWPTP	63	0.09	0.06	0.02
249	FSP_SH2B1_1	chr16:28883208	ASPLKRDPQQGQFIPSQPPTLPWTLRKQPQGPSCSRGSQRAVRGTSPSQGILGSTGCSLGSRLHSWC	67	0.03	0.07	0.02
250	FSP_SF3B2_1	chr11:65836146	NGKLSPRTAVGAARNIRSSSFRSPHTSPFFGPTSGCLGFTQEPPLPQFPRTCHFMFLF	58	0.01	0.08	0.02
251	FSP_BLM_1	chr15:91304139	MKALISQEMFSQALL	15	0.13	0.28	0.05
252	FSP_FLNB_1	chr3:58089788	DTTFQRAPLKFKLALKRVCRKSVLGSGGQRTSW	33	0.04	0.07	0.05
253	FSP_NUP214_1	chr9:134007993	SFLVLRFMSQIILSEFWMCCGLVPTSSP	28	0.12	0.06	0.04
254	FSP_ZNF831_1	chr20:57769140	TRGTGWPLAGQQPGSCPSQHQGLPGRLPPPRPLQRVRHT	39	0.09	0.05	0.02
255	FSP_IDE_1	chr10:94243045	CRRLVSTLNFSAHLLMWTPCTVTWPICTLSSSKTHSTSMHMQQS	44	0.07	0.04	0.02
256	FSP_RNASEH2B_1	chr13:51530587	LERFETLKIKSSKNICFLHVSVCPS	25	0.15	0.02	0.05
257	FSP_ZSWIM8_1	chr10:75560464	TLMMSNGCWGWQQSWE	16	0.13	0.11	0.07
258	FSP_ATM_1	chr11:108216477	SLLKRNMKSSWMFAKIFNQFSVTSAWKNSWIQLFGLRSDWLIRAV	45	0.04	0.06	0.01
259	FSP_SBF1_1	chr22:50898756	AGSTGASRPLRTRRTRSQCRRSWSPAR	27	0.06	0.06	0.04
260	FSP_KSR1_1	chr17:25910016	HPAARSSSCCPAPMSLSWGTALMTSPR	27	0.09	0.05	0.04
261	FSP_CEP57_1	chr11:95555113	RSQNHQKSPQALAMPW	16	0.04	0.07	0
262	FSP_CEP57_2	chr11:95555113	RSQNHQKRKVLGTILVHNHIIDYAWVICHL	30	0.04	0.07	0
263	FSP_EPG5_1	chr18:43459143	ISFGYPRWTLKALVYSQNGVLIWLM	25	0.06	0.12	0
264	FSP_POLD3_1	chr11:74336609	KEKKGGSE	8	0.19	0.15	0.1
265	FSP_MBD6_1	chr12:57921732	ELLHPSQRLLVP	12	0.09	0.14	0.05
266	FSP_SGOL2_1	chr2:201436992	VIFFSKPKRIKNLSLKT	17	0.09	0.11	0.02
267	FSP_CNTNAP3_1	chr9:39073899	KSARTALNSELDVQNAVHENQKERVF	26	0	0.11	0.02
268	FSP_ZNF43_1	chr19:21992087	IILDTAKLLTSPQSLLPIR	19	0.01	0.12	0.03
269	FSP_CYB5R4_1	chr6:84634231	RILLGTFLAIP	11	0.17	0.09	0.04
270	FSP_CTNNBL1_1	chr20:36361416	GCCRLLTEMGKRKRKRRSHWMKAQ	24	0.09	0.04	0.02
271	FSP_TMPO_1	chr12:98921672	LINPDKKIKMI	11	0.13	0.08	0.05
272	FSP_PPP2R3C_1	chr14:35585935	NKKKVNKN	8	0.22	0.04	0.05
273	FSP_LPAR3_1	chr1:85331665	FIFFLILWSSRQ	12	0.12	0.12	0.05
274	FSP_SSB_1	chr2:170665008	MKKENKIKWKLN	12	0.07	0.07	0.04
275	FSP_RING1_1	chr6:33178990	KESPGREKGMEKM	13	0.12	0.05	0.01
276	FSP_SLC11A2_1	chr12:51392999	LAFSSLLWPSHLDMSMLQ	18	0.07	0.04	0.01
277	FSP_EXOC1_1	chr4:56765965	KPNKNTQITFSLMSFTL	17	0.06	0.04	0.02
278	FSP_CNOT1_1	chr16:58589340	RFFPSILIKSYI	12	0.09	0.07	0.01
279	FSP_DCHS1_1	chr11:6662142	GSPPGGPRPCWT	12	0.04	0.07	0.03
280	FSP_OCA2_1	chr15:28200305	SIGYLTGFCSPNA	13	0.09	0.13	0.04
281	FSP_CLCN4_1	chrX:10188763	EEPPSCRPTAHIP	13	0.07	0.02	0.02
282	FSP_TRAM1L1_1	chr4:118005517	EQKTEWEWKLQIE	13	0	0.09	0.02
283	FSP_ATAD2B_1	chr2:24086326	KVAFLCEKEQIV	12	0.1	0	0.02
284	FSP_ZNF506_1	chr19:19906351	QLKKAVKV	8	0.04	0.07	0.04
285	FSP_RBM43_1	chr2:152112048	LQRMSSDKRNTG	12	0.03	0.07	0.01
286	FSP_RAD50_2	chr5:131944382	INKKIQATK	9	0.1	0.02	0.02
287	FSP_MFRP_1	chr11:119213688	TSSPRTMSWLCCLGQIMASAVEASQPPTWPSMPRRTPVGPVSSPARQEGVRVCSGCVTCGETAPMAAMTTAAAPCSHPQSWPVSLSRWRCASV	93	0.03	0.12	0.05
288	FSP_ZNF793_1	chr19:38028415	VGKPLPRSHTAQNIREHTQERDPLSAVNAGNRLVRSHTSMYIEKCTQEKDRIVAENVENPSARSHASINIGELTQERSPMGAMNVGKLSTRSQTSADIRKFMLGRMPTGMKT	112	0.07	0.08	0.02
289	FSP_PLK2_1	chr5:57753012	CRASLRTDCLLAVVIQFQISTYQAQLRISLRKKKTKQDILTHIIECLKKMKTSTSLGMI	59	0.16	0.11	0.04
290	FSP_KMT2D_1	chr12:49443667	VAPCPWSWGSLRMLVQPEMRAPYGSVLTHCQRLMTHYCAMLGQLSAEAKLRGRRGGGAAPQPVPASNRVAAAVSQEDAGLVEEPMEDVVEDGPG	94	0.03	0.04	0.05
291	FSP_NTAN1_1	chr16:15131990	NTHLQLTHCFLEIKPYSTKKMKMACGKRSLLQEVKKHELPKKAPSWPDRPLVGLARIQIWILHLLGLRPPSLLSVFQMTFIK	82	0.13	0.02	0.02
292	FSP_CCAR2_1	chr8:22472975	GGFRQWWCTCRMSGPSCLLWRSGRPCASRKLQRQLPQPRRHKGKRSLLNRHLMPWSKQQTLLDGTQKLQRPPHSRKRTLISQRPLHPP	88	0.03	0.08	0.02
293	FSP_UBQLN2_1	chrX:56591874	LAGLLCPALHLVKPRVLHQNLDPTSSSFSKWCRPWLEQMLHSCRIQKSDFSNNWNSSTQWGS	62	0.16	0.01	0.04
294	FSP_ZNF133_1	chr20:18287008	NVHRQPVQIIKNMETTVTYRKKQIQSQSSTSILSALRVSPVRNSPCSMCCVIIPPGSSHACVQKVTSSLGIRAQGTRRSSNKPLRGDPGVIVPCLCLEEPRKGLWERSPGHPRGSQSALGTASEGWS	127	0.06	0.02	0.01
295	FSP_ZNF133_2	chr20:18287008	NVHRQPVQQIQSQSST	16	0.06	0.02	0.01
296	FSP_ZNF133_3	chr20:18287008	VHRQPVQIQSQSST	14	0.06	0.02	0.01
297	FSP_TTLL10_1	chr1:1116223	SRPGWKRTQQRPPWRTSRGQAQDTSGHRGS	30	0.3	0.05	0.07
298	FSP_CELSR1_1	chr22:46931227	AAALGLRILPPPLTSPSRSTTAPVGSQCVPSWTARRWSTTASGWRRWTTARPP	53	0.04	0.08	0.06
299	FSP_VEZT_1	chr12:95650969	LSAIRKMTYFTSWILDSDSTHYIPSCNRKSCYKRMWS	37	0.26	0.09	0.01
300	FSP_HDAC4_1	chr2:240002823	WETLSTWRPSERWSCRSPASLPRMWCWCHQASMPWRATPPLLGATTSPPDASGT	54	0.09	0.09	0.03
301	FSP_CIR1_1	chr2:175213713	YKGRKERKTSVQGITTVILKRRTSLRRESFMKNFLAVTITGS	42	0.15	0.09	0.04
302	FSP_TNK2_1	chr3:195595229	RPPMTTWPRMRMTLRWARGSLPGPARARPTTPLLPWRTTCSSRPRVGASRPAPHRPQRSSRRYSRSA	67	0	0.11	0.04
303	FSP_LRP1_1	chr12:57572242	RSTGLTGEQTHWLRPTSGPATMSPWYRGPTPSPLTCRCTTPPASPWLPIPVRPMGARAPAPTCVSSTTTGS	71	0.04	0.07	0.03
304	FSP_RGS12_2	chr4:3432431	RSLPAGPSSRRRAPPRSGRGSLRKWRPGASRRWRMSTWPS	40	0.13	0.11	0.04
305	FSP_KLHL42_1	chr12:27950769	VSTSWGPTAGAARARTCSPCSPTTPSPASGSTSRRTRPNRVLT	43	0.09	0.12	0.04
306	FSP_BEND3_1	chr6:107391602	TWPAACWATWTSPGAAVPVALRPSASWSRCTCSSSATMWRSTTPR	45	0.06	0.09	0.05
307	FSP_EPHA2_1	chr1:16462199	RRSRAECGSTRSLTARRETPTATMCAAPRVSP	32	0.09	0.12	0.07
308	FSP_SEC62_1	chr3:169700664	MVKRKNPKRRKLQELLKRRKLRKNSNLSHMMIRFFWMEMRCMYGSMTQFTLKHLSWD	57	0.12	0.05	0.02
309	FSP_BTBD7_1	chr14:93761193	REPLVLSVGNLIGLPIMPSRCENSSLGGMLEMSMH	35	0.1	0.13	0.04
310	FSP_DENND1C_1	chr19:6477251	LPGGIASRFPASWPRTPAACHPSLRTGT	28	0.1	0.11	0.08
311	FSP_NID2_1	chr14:52481919	GMTSTCPSAMTWATSSPCSATERATSAGVWTKMAERCRAPAPSQAPPLRVYPPSLHPWSGPRPGQM	66	0.03	0.07	0.02
312	FSP_AK9_1	chr6:109850222	GGRMLLEMMKRLVRKNLKKTMMILKTSLKMSFQKMRKR	38	0.09	0.08	0.03
313	FSP_PPP1R26_1	chr9:138379043	SHIWPKGFEAQRAQEHRAQLVCSALLPEGIRCRPGAPAAVSPPRGSQ	47	0.1	0.08	0
314	FSP_PHACTR1_1	chr6:13206135	QTSHWCPTQPRRVASRVWPSTTTLSCPPRSSTSCSTAATAPSPCTPRAAE	50	0.1	0.07	0
315	FSP_DNAH7_2	chr2:196866535	SNCQLVTAVPNWNLFSTVLLHL	22	0.13	0.11	0.06
316	FSP_AHDC1_1	chr1:27876869	NDGGGSRSWHLPSHPMQQTPTTARPSTQTSWPSWPS	36	0.09	0.06	0.04
317	FSP_ZNF124_1	chr1:247319909	LILEKSPINVKKCKGFNHYSFCQKHEQSHT	30	0.07	0.09	0.04
318	FSP_RBM6_1	chr3:50099450	NPPVKESQVARRKCLKEMARRKKTEE	26	0.15	0.05	0.05
319	FSP_TRAPPC8_1	chr18:29453418	LAMTDDQRMVKNKQLLM	17	0.22	0.13	0.04
320	FSP_ARFGAP3_1	chr22:43213780	MLTQTDSAWDLEIAEVLFHIQ	21	0.15	0.11	0.04
321	FSP_DTX4_1	chr11:58962827	AFRDRNTRILGRVSAPEASHDTVTFRTARKGEKF	34	0.04	0.04	0.06
322	FSP_FHDC1_1	chr4:153864507	GKLFRRSKFEAKPTSGPWQPGRNITTKLIQRPLRSSLGSRKTPPSLPFLGEEEL	54	0.01	0.06	0.02
323	FSP_RNF103_1	chr2:86831015	SSHMHNTSPCQMMSHLNHVQFVLYKL	26	0.12	0.08	0.03
324	FSP_MARS_1	chr12:57883053	CYLAGSKMTSLTSGWNGKRQSCSQLCLLPCTI	32	0.1	0.06	0.02
325	FSP_CASKIN2_1	chr17:73498973	RRGTSQRAQSGPLSFVLHFLAKDPHPMFLCTPRAHPLARPQGHLLAHPGPSPTWPGPLPLPQTRLDLSAGPTA	73	0.06	0.04	0
326	FSP_TMA16_1	chr4:164428219	SSIHIVEKQLKLRERPTNKKKRKN	24	0.2	0.06	0.01
327	FSP_GTF3C3_1	chr2:197649614	LQKKAPQKRIKLLRMLPALYLMACQ	25	0.1	0.08	0.04
328	FSP_FAM98C_1	chr19:38899416	AAQMSWSLPCPPGGAEERMEAPSVGVARRRRRSKGSSMRC	40	0.03	0.06	0.03
329	FSP_PXDN_1	chr2:1652960	MTPGPGAGPAACSSCAPALCAAAA	24	0.04	0.11	0.05
330	FSP_UBB_1	chr17:16285785	TSRGSSLQASSWKMAALFLTTTSRKSRPCTWSCA	34	0.06	0.04	0.04
331	FSP_ADAMTS18_1	chr16:77356311	FEFFLQCPAK	10	0.23	0.26	0.05
332	FSP_MOK_1	chr14:102718303	LCTICTSYVSPWIIFTEMEYFTEM	24	0.06	0.09	0.04
333	FSP_NEK1_1	chr4:170428203	CGKSIWWLKELRVLMFLHLWDSMKQVALHQSNR	33	0.09	0.07	0.01
334	FSP_B4GALNT1_1	chr12:58025103	ASPSPSRNKSELLTSPRPLTLQS	23	0.09	0.09	0.02
335	FSP_G2E3_1	chr14:31074772	LKDCISTKPISGIVP	15	0.15	0.11	0.05
336	FSP_TCP10L_1	chr21:33949091	VSEDGKVASDTCVTLHWPLGKFRFR	25	0.09	0.04	0.04
337	FSP_CKLF_1	chr16:66599895	KFCNFILLFSLILSIKHISVFFHIFSAVILTQYRS	35	0.07	0.05	0.01
338	FSP_CLCN3_1	chr4:170613460	GRCYQLPQLQGFL	13	0.09	0.08	0.02
339	FSP_CLCN3_2	chr4:170613460	SKLYGDHFLLL	11	0.09	0.08	0.02
340	FSP_CSF3R_1	chr1:36935323	ARAIATRPGGWNRMGEPRGFC	21	0.12	0.08	0.02
341	FSP_NR2C2_1	chr3:15084406	EELFLLVSLAMFR	13	0.12	0.18	0.04
342	FSP_WDR60_1	chr7:158704353	IPSRHMFSVTKIMLKETFKRRK	22	0.1	0.08	0.02
343	FSP_NSRP1_1	chr17:28505167	RRKIIPNCFWGKTESPSIFTTC	22	0.13	0.08	0.01
344	FSP_TFEC_1	chr7:115594657	RTTTTSLKEEEGIILITESRSLALLFQSLMILICAGTKEPF	41	0.01	0.06	0.02
345	FSP_PIEZO2_1	chr18:10741064	SSGGGLGLIMLPWSGVEIIICLKRIVKRRKRKN	33	0	0	0.07
346	FSP_LIPT1_1	chr2:99778781	TTKKSMIEWKI	11	0.09	0.29	0.01
347	FSP_GAS6_1	chr13:114542718	AGSATKMSTNAARRTGAASRSATTSRVASTVPAMAGPAKT	40	0.01	0.07	0.01
348	FSP_FAM60A_1	chr12:31448178	GSKKTGIMW	9	0.33	0.12	0.04
349	FSP_AKAP9_1	chr7:91603085	REKRQAVNMMCQHTMI	16	0.1	0.13	0.02
350	FSP_IL7R_1	chr5:35874637	GLSLSYGPVSPIIRRLWNIFVRNQEKI	27	0.04	0.06	0.03
351	FSP_TTK_3	chr6:80720630	SSCFQRRKRRIYQHLRY	17	0.09	0.08	0.04
352	FSP_KDM6B_1	chr17:7751137	ALPHHPSPIARASWGLRPPAFLWALRILTPLPLPQPQPPAVATATVAATAAALLGLCPFPHHPIWPEV	68	0.06	0	0.01
353	FSP_ZMYND8_1	chr20:45875072	SPSLQTQWRLKRS	13	0.07	0.14	0.05
354	FSP_MYBL1_1	chr8:67488453	TLVMVATVKLFL	12	0.09	0.17	0.05
355	FSP_VPS13C_1	chr15:62244050	LVCSALISLTLKGNLFTLLTLLM	23	0.1	0.04	0.02
356	FSP_PLXNB1_1	chr3:48465485	VAFHPSQPGPCGRPTPKLPSPMRRQPSWQWAASPSTATTS	40	0.06	0.01	0.02
357	FSP_HAUS3_1	chr4:2242634	LVIPKLIILMEKTLTGCLRALKMNRF	26	0.03	0.06	0.03
358	FSP_TBCK_1	chr4:107156505	TKSGKKQELTFLLL	14	0.1	0.06	0.06
359	FSP_MYRF_1	chr11:61539013	ESPPAPSMPRC	11	0.07	0.15	0.06
360	FSP_RIF1_1	chr2:152320541	RQTLRTLSLRGMVPRTL	17	0.1	0.12	0.01
361	FSP_BZW1_1	chr2:201683505	TTSQSQLSSE	10	0.04	0.07	0.04
362	FSP_BZW1_2	chr2:201683505	EMKKTTFIS	9	0.04	0.07	0.04
363	FSP_JAK1_2	chr1:65339111	RFQMQPLSLMPAHWSICLLRDSMIW	25	0.03	0.06	0.03
364	FSP_SAMD9L_1	chr7:92760738	VWKKMKSKTSCVV	13	0.12	0.12	0.03
365	FSP_ABCC4_1	chr13:95696016	SGRNLPTAPC	10	0.16	0.13	0.04
366	FSP_OPTN_1	chr10:13151192	TWPTQTWTRLPRRSCCSR	18	0.04	0.11	0.02
367	FSP_CHEK1_1	chr11:125505378	HTSTLGKKSILLL	13	0.09	0.11	0.04
368	FSP_NHLRC2_1	chr10:115662308	GIYFMLQTPTITRLKLWIQKQKTVQH	26	0.06	0.04	0.02
369	FSP_GNG12_1	chr1:68171151	LASSYSGIQQRKL	13	0.13	0.11	0.02
370	FSP_TRIM46_1	chr1:155152179	IHHLPGTIPLSSGARMCLLSQAPPAGSGGRR	31	0.06	0.04	0.01
371	FSP_ZNF469_1	chr16:88504203	GSPSRSAACGGRERRDRRPGPSRAHCPANGAGWPCPAVPLGPARTGLLPGEAAPS	55	0.06	0	0.01
372	FSP_UBR4_1	chr1:19467923	CWTSHLMQMTRPWLN	15	0.01	0.05	0.08
373	FSP_ZCCHC7_1	chr9:37357250	QRKKSLKPSGSL	12	0.09	0.14	0.02
374	FSP_ZC3H18_1	chr16:88691141	RTPPGGGR	8	0.15	0.11	0.08
375	FSP_CCDC73_2	chr11:32637520	EEKKKAHL	8	0.2	0.13	0.05
376	FSP_AXIN2_1	chr17:63532585	ATVPTCSPRTLRCLP	15	0.12	0.09	0.01
377	FSP_KANSL1L_1	chr2:210887680	IGDREQVKKTM	11	0.07	0.12	0.05
378	FSP_APPL1_1	chr3:57276921	LSKKEKMTR	9	0.15	0.11	0.05
379	FSP_BRCA2_1	chr13:32954023	LSINNYRFQMKFYFRFTSHGSPFTSANF	28	0.07	0.04	0.01
380	FSP_GRIN2A_1	chr16:9857380	APFSPKVWRTARGASLSCQTTPPITLSSTPR	31	0.04	0.06	0.02
381	FSP_INO80E_1	chr16:30007665	DYKKNTGI	8	0.19	0.11	0.05
382	FSP_FCHO2_1	chr5:72264329	IVALMSSTII	10	0.2	0.02	0.04
383	FSP_GOLGA2_1	chr9:131019390	IPFFTGLTRMMR	12	0.06	0.09	0.04
384	FSP_ZNF131_1	chr5:43173517	EGRSSTNARSATVCLTAGTSSKITW	25	0.07	0.04	0.01
385	FSP_CHPT1_1	chr12:102108338	SFIALIGRLMFQAC	14	0.07	0.06	0.04
386	FSP_ABCA10_1	chr17:67218780	NTMKWWELYLVILSHIA	17	0.09	0.06	0.01
387	FSP_SGOL2_2	chr2:201437004	SKPKRIKNLSLKT	13	0.09	0.08	0.02
388	FSP_CREBBP_1	chr16:3817721	SLNQRSYARPSCQP	14	0.12	0.06	0.01
389	FSP_N4BP2_1	chr4:40144449	MSPPFMPSRVLFMSRR	16	0.06	0.04	0.04
390	FSP_SLTM_1	chr15:59186310	IRVIEVARHKPLLRNLKKKKARILRK	26	0.06	0.04	0.01
391	FSP_KCNH2_1	chr7:150656679	PAGWPQAAPRPSA	13	0.09	0.05	0.04
392	FSP_SLC17A5_1	chr6:74351590	MATSSHRFLEDMLPAK	16	0.06	0.08	0.01
393	FSP_CRTC1_1	chr19:18887993	ESPPASLKN	9	0.1	0.12	0.04
394	FSP_DGKA_1	chr12:56347514	GPPPAPPISLAS	12	0.06	0.07	0.04
395	FSP_ZSWIM6_1	chr5:60822215	TQKKSYPIKT	10	0.19	0.01	0.04
396	FSP_PCDHB4_1	chr5:140502487	NWISKKLNLTM	11	0.07	0.08	0.04
397	FSP_KCNQ3_1	chr8:133150233	LYKKNSRRL	9	0.04	0.19	0.02
398	FSP_CDC25C_1	chr5:137627690	SIFLAKESSGRAYV	14	0.06	0.07	0.02
399	FSP_UBE4B_1	chr1:10177642	HQRCAASQQSASF	13	0.12	0.06	0.01
400	FSP_MCEE_1	chr2:71337212	DLKKRRSAV	9	0.09	0.09	0.04
401	FSP_CNTLN_1	chr9:17135271	QLRLMLPSSARPWGPDG	17	0.09	0.04	0.01
402	FSP_NUCB2_1	chr11:17352468	NYNKEFLHQGQLEN	14	0.07	0.01	0.04
403	FSP_CHD9_1	chr16:53263000	LQTWKKNHLTQTTLK	15	0.09	0.01	0.03
404	FSP_RALGAPB_1	chr20:37146233	HITGGTGLLL	10	0.07	0.08	0.04
405	FSP_PLXNB3_1	chrX:153042691	EEGGCASGTW	10	0.12	0.04	0.04
406	FSP_U2SURP_1	chr3:142775212	NQERSPDPSPDLHTGLIKSQRKTNTDVNF	29	0.06	0.01	0.01
407	FSP_FKBP15_1	chr9:115941002	AHQKRKQSCRCS	12	0.07	0.04	0.04
408	FSP_LNPEP_1	chr5:96315249	CHKKTSQLD	9	0.1	0.08	0.02
409	FSP_TRIP11_1	chr14:92472698	REFINLKMIKWTLLKS	16	0.06	0.05	0.01
410	FSP_TMEM232_1	chr5:109940905	IFYTWTNQYLQN	12	0.09	0	0.04
411	FSP_KIRREL_1	chr1:158058203	SLSPGPKRTQIWS	13	0.03	0.06	0.03
412	FSP_ZNF776_1	chr19:58264857	NWMTMQTIIKNRTEAMPREHLL	22	0.01	0.06	0.01
413	FSP_TBC1D31_1	chr8:124140521	EFFFTIGITWI	11	0.07	0.05	0.03
414	FSP_SLCO2A1_1	chr3:133670083	FPFFSSLEQCP	11	0.09	0.06	0.02
415	FSP_ANKRD20A4_1	chr9:69421905	LYKKIEKN	8	0.04	0.09	0.1
416	FSP_YBX2_1	chr17:7193637	HPSSTDGGLCEAPGLPTSSSL	21	0	0.06	0.01
417	FSP_INADL_1	chr1:62253580	LPLQPYLLPCLL	12	0.07	0.02	0.03
418	FSP_SLFN12_1	chr17:33749493	LIEQNLIGKKN	11	0.1	0.04	0.02
419	FSP_SULF1_2	chr8:70488249	EHGGPPSSMPL	11	0.01	0.09	0.02
420	FSP_PPP1R36_1	chr14:65035126	THWKRNPKAIW	11	0.06	0.05	0.02
421	FSP_SLC16A1_1	chr1:113471890	GYTPQMEAGAGQW	13	0.09	0.02	0.01
422	FSP_IQGAP1_1	chr15:91019925	LTKKIRNSCLI	11	0.06	0.04	0.02
423	FSP_SNAPC2_1	chr19:7987519	QPPRRPSTAN	10	0.03	0.06	0.03
424	FSP_EFHC1_1	chr6:52334208	APKKTLLKCW	10	0.09	0.05	0.01
425	FSP_CASP8AP2_1	chr6:90576391	DMKKNCGSL	9	0.12	0.02	0.02
426	FSP_EBF3_1	chr10:131666125	WTTGVPPSS	9	0.07	0.07	0.01
427	FSP_SERPINI1_1	chr3:167507159	DSLKMVKNFLS	11	0.01	0.08	0.01
428	FSP_PTPRT_1	chr20:40739003	FLNPRKLGP	9	0.09	0.07	0.02
429	FSP_BRD8_1	chr5:137505021	KTPPGGYPL	9	0.06	0.04	0.02
430	FSP_MAZ_1	chr16:29818054	SPCWAWTPGGWAAS	14	0.06	0.04	0
431	FSP_TRUB1_1	chr10:116730192	QVPPSILH	8	0.07	0.07	0
432	FSP_RAPGEF2_1	chr4:160253755	VKPTLWEEGTS	11	0.07	0.02	0.01
433	FSP_IL2RG_1	chrX:70327614	YWAPHVTP	8	0.09	0.04	0.01
434	FSP_ATRNL1_1	chr10:116887435	LLHFLVMLRII	11	0.06	0.04	0
435	FSP_SGK3_1	chr8:67716612	NTLKNSFLLWP	11	0	0.06	0.01
436	FSP_SCAPER_1	chr15:76958036	ERQKIKKKPKR	11	0.06	0	0.01
437	FSP_ACBD3_1	chr1:226352491	GRRKRSEGGVKRKKENVCKRRKRNVGEKKRKGFDGRKRKGDG	42	0.12	0.09	0.07
438	FSP_FBXL3_1	chr13:77581683	YMKKNLTPSFAMKYLPPICTLGDQ	24	0.16	0.11	0.09
439	FSP_HOMEZ_1	chr14:23745310	YSASGHGVRITKS	13	0.19	0.12	0.04
440	FSP_DDX17_1	chr22:38895455	EMFVLNPCLPSIMLTSHNM	19	0.06	0.06	0.03
441	FSP_SMAP1_2	chr6:71546674	VPALKKLRSPLWIF	14	0.04	0.02	0.05
442	FSP_RARRES3_1	chr11:63313709	RQPEAATKSCVRSSCGGPSGDEPPPCLQQPDPRALSQAFSRSFPLFPSLAGKSMI	55	0.19	0.18	0.06
443	FSP_SAFB2_1	chr19:5587282	RTPTSPAATKSHSLRVFGWADALLNLVARVPSNLGDLFKSKVNPATML	48	0.17	0.13	0.08
444	FSP_ZMYM2_1	chr13:20638677	REPRERLYQDTSLMMIVLTIQNAAFLSNIRMA	32	0.15	0.02	0.11
445	FSP_PRTG_1	chr15:55912892	SKTQRRYKLSSLKEDLLQRSAFTSQAPLY	29	0.12	0.14	0.04
446	FSP_CAMSAP1_1	chr9:138715800	PGLRPSQHLLLYITLRVVKWIPALATASAWPAPSAKTVWHPTLLI	45	0.12	0	0.04
447	FSP_PRPF40B_1	chr12:50025258	CHLASCPQCFHQWGRHHHSHRYQEWYLR	28	0.06	0.07	0.03
448	FSP_FRMD4A_1	chr10:13696452	GATPQAAPTTS	11	0.15	0.19	0.04
449	FSP_ZNF292_1	chr6:87969484	VLTKQKVLYK	10	0.13	0.07	0.04
450	FSP_CEP290_1	chr12:88449444	IKALLTLNSL	10	0.12	0.04	0.05
451	FSP_HPS1_1	chr10:100186987	GTPPWMPFR	9	0.15	0	0.07
452	FSP_TICAM1_1	chr19:4816465	HRPPHSQQPFHSHCPSRSPQPSLRPHPHPLRAQGCNPSLSTTHRWYSWG	49	0.12	0.12	0.04
453	FSP_ERCC5_1	chr13:103524612	NYGHCNSPLAFLTQLLPRPTSNPWWMTRRDPFCGGNLISTKLENFVSGISAGTERRQMNLCFLY	64	0.13	0.06	0.03
454	FSP_KLF3_1	chr4:38691476	RKHCCKRITLRSSCSLGRDLYLWNPRILKGSGGYTDVIMMDATKCTLKAPT	51	0.04	0.12	0.04
455	FSP_ITGA6_1	chr2:173368931	NSGSQSGTKMKATHSGGLKKKSFTVPKLLFPTQKFNLDLKACSIPED	47	0.03	0.02	0.06
456	FSP_CCDC15_1	chr11:124845049	RDQCFQMMEGKAFLPERKCFPGNQHPLG	28	0.13	0.04	0.07
457	FSP_MKL2_1	chr16:14346300	AMRRPSSRHAAHRPLCQRFPTLTVSRWMTSLISSLRVERSPSP	43	0.09	0	0.03
458	FSP_ILK_1	chr11:6629392	CIWQPVMDTVILYRSYCSTRQTSMQ	25	0.04	0.05	0.07
459	FSP_MBD6_2	chr12:57921401	NSLALCWVPACWVTCLH	17	0.09	0.12	0.05
460	FSP_RMDN3_1	chr15:41029894	LLQPCLKALSVPLWKMPSRAS	21	0.06	0.13	0.02
461	FSP_NUDT7_1	chr16:77775744	NPPLRFNLILMMY	13	0.17	0.15	0.02
462	FSP_NOL4L_1	chr20:31041556	TALGATIPSRPRSAAALRT	19	0.2	0	0.03
463	FSP_PTPN21_1	chr14:88940113	DAKKLVLLNWLP	12	0.15	0.11	0.06
464	FSP_SEL1L3_1	chr4:25849258	GGRMRNIFTPAGHK	14	0.16	0.09	0.01
465	FSP_KIAA1429_1	chr8:95531563	LCRNMKQQIY	10	0.09	0.06	0.06
466	FSP_EMILIN3_1	chr20:39990829	GEWAALGPCWKSACRASRSA	20	0.03	0.06	0.02
467	FSP_LOXL3_1	chr2:74763924	CPGGALQW	8	0.12	0.11	0.04
468	FSP_ADAMDEC1_1	chr8:24257686	EAKKRIMWLL	10	0.09	0.09	0.03
469	FSP_MAMSTR_1	chr19:49218106	HTSWNFRPLNWRS	13	0.06	0.05	0.03
470	FSP_SRRT_1	chr7:100479332	VGAQLMLTSTSCSTMSCLSRPGWAALQRLTWVCRRP	36	0.09	0.2	0.07
471	FSP_RAB40B_1	chr17:80615786	RAPPKTAPETAAKFLKEGTERNTAESLQEKLGVTPGSWWMHLRSRFLSANAACECVRRLPCDGNTLPRRTSNFYVDVHEALVFDVCL	87	0.03	0.08	0.01
472	FSP_MPRIP_1	chr17:17046886	QLLSQTPRLPPCLHTEEPSHWTGGPRSPP	29	0.04	0.14	0.06
473	FSP_NKTR_2	chr3:42679486	IAFHIKSIAAALKRHFTVNMSKVETGLHV	29	0.15	0.06	0.04
474	FSP_ANKRD49_1	chr11:94230059	WKKTQADCFFGLLKKIGLPQCGDSFLKRPLT	31	0.12	0.09	0.02
475	FSP_FLT3LG_1	chr19:49982166	AVFASSRPTSPASCRRPPSSWWR	23	0.17	0	0.08
476	FSP_DDX60L_1	chr4:169317264	TQRRLKNWKEKKCIELNILISWRI	24	0.22	0.06	0.02
477	FSP_SV2A_1	chr1:149884981	RHNDGKNEKNWPNSMKPSYGSVATAASSGHCILCLVWR	38	0.06	0.04	0.04
478	FSP_COIL_2	chr17:55028118	TREKIKQPVAQWVMITKRPKENHQRKRRNVNIKKRLRIPSLRKYRQ	46	0.03	0.08	0.01
479	FSP_C1orf112_1	chr1:169790867	LPTPFCTTLRNFFLSSLILAVLCTNCIFRYTASFLQAFMLPGFLKHTKRK	50	0.06	0.04	0.02
480	FSP_UGDH_1	chr4:39515753	LPILMMPSKKLILYLFLCCPTLSFWQREQPSRT	33	0.06	0.09	0.02
481	FSP_NLK_1	chr17:26449740	LSMIMYSLPLTYSNLHTLTILKKYMLSQN	29	0.04	0.08	0.03
482	FSP_RQCD1_1	chr2:219449364	CTPFCTLSAKHVPLSISGSPALELLGPW	28	0.09	0.01	0.02
483	FSP_MTR_1	chr1:237024474	LNQKNIPDLSI	11	0.13	0.06	0.07
484	FSP_KMT2B_1	chr19:36223002	VSPLAPCPPLEVHLH	15	0.07	0.05	0.05
485	FSP_ISG20L2_1	chr1:156694023	STGRLTARRMPPCL	14	0.04	0.07	0.05
486	FSP_VEGFB_1	chr11:64004663	RPKKRTVL	8	0.15	0.15	0.04
487	FSP_ZNF90_1	chr19:20228702	VVKVWMRVKYTKEVIMDLTNV	21	0.06	0.06	0.01
488	FSP_PREX2_1	chr8:68992721	FRFFRMRKWRDQI	13	0.07	0.13	0.01
489	FSP_RNMT_1	chr18:13746253	HFWNSTKKRLRTMKIKCS	18	0.04	0.07	0.02
490	FSP_LINGO4_1	chr1:151774033	LPVLAPIMSRGRA	13	0.04	0.06	0.03
491	FSP_TEX10_1	chr9:103111633	MTKKENANMIFKK	13	0.06	0.05	0.03
492	FSP_SMC2_1	chr9:106885501	ALKKPLRKVRRL	12	0.06	0.08	0.02
493	FSP_DHX57_1	chr2:39074185	DQFFWKMQLL	10	0.1	0.04	0.02
494	FSP_PVRIG_1	chr7:99817848	APTVLGGPRWLCCTQNVASGNGPLLARPAGKPRAASLSSWKALGPSAASLRPSLRAPGRPVGASRPAQTQGSLPRRLLPPFCGQTWPGSWGSQESFICCADISTALPLGSSRPAPAPRHREHEHGHQARPPRLLFTSLMQLLWTQLTRHSPPTLHTGPHPSLHVAALSLLRMDSTLRQGASLFSLTLGGPGPWKDP	196	0.01	0.02	0.05
495	FSP_CHD4_1	chr12:6711546	RSVCSYAGSWGTALGRGQSLWRRRKRWLCAQTVRAATILLARRRRRSLDLRKRRRANRRMMMMIQRSLNHLLSSWKTGAWKTLTTCSQRRIIEPSPTTRPSASLSDPSLLPKIPRLLSPR	120	0.06	0.09	0.03
496	FSP_CHD4_2	chr12:6711546	RSWGTALGR	9	0.06	0.09	0.03
497	FSP_HDGF_1	chr1:156715104	SGPTRRHSWAPKTSSLTRNPRRSLASPTRGKGSARGCGRSRTTLLSRLPAISPPRKRAVWKSLNQSPKLQRVTVIRRGMQRAAATRKGSWSLMSQPRRRTRKER	104	0.15	0.07	0.02
498	FSP_HNRNPL_1	chr19:39330959	HLTTKGEGWVHQWGVTVGAQVATAPSMGTPHPLPHHPSMALTPTALCSWSMAWINLR	57	0.25	0.09	0.02
499	FSP_ZMIZ1_1	chr10:81072446	TCRAIVTMTSCLYLRTTEGHPVGAIPPHSASYPTYPTHFSTWEPVPSDRPAGALPRCSPLRTEG	64	0.07	0.12	0.06
500	FSP_USP42_1	chr7:6196443	RRRKRRDIQENQRTLLKIQNCTYPGSPAWRLVAFLSLVARLWKASDLSVRKRNTYGWKLSMARVIENSASKQKIH	75	0.07	0.05	0.03
501	FSP_PLOD3_1	chr7:100855927	GCFWPCLWNSLLRFCPASCSGCYSWTIPPTGSPFSCTTTRSSMNPTSLTPGRSSRTTSQL	60	0.04	0.08	0.03
502	FSP_BTBD11_1	chr12:107937778	CTTSRGHCTGSPRPCTPFAISCTAHKWNGKTPTWSLPKSTSRWKGPSSCCRR	52	0.06	0.06	0.05
503	FSP_DYNC1I2_2	chr2:172546762	KQTRRRKLLLLCKKNQILKKKGEKLKHCFKAWG	33	0.19	0	0.07
504	FSP_SORL1_1	chr11:121475905	CPLLLVYIMSTTGWLERAYGRLWRPTAIRQTLY	33	0.09	0.13	0.04
505	FSP_KSR2_1	chr12:117977605	SLLVPRRLLPYTLPHSAHGSRRTSTCQHPTTTNTSSSSSSQMWCRPRSSCIR	52	0.06	0.04	0.03
506	FSP_KANSL1_1	chr17:44109601	SLPPLMSAVATLCQNTPMVSPLGAPLARNCTQHPSPLWLGTLRDT	45	0.01	0.07	0.04
507	FSP_DNAH11_1	chr7:21939669	QRKIMDTRQGKVHTSTDSSWRAPAGTPKQEPLLKPVSRSWHALCRSSLQKPPPWTDKKPNRPTSALCIEPN	71	0.07	0.02	0.02
508	FSP_PHF20L1_1	chr8:133826909	MKLTLAVLPTLRNLHCYPQLCLQGRLAARNANMNLEILLGV	41	0.07	0.05	0.02
509	FSP_ZMYM3_1	chrX:70472854	CSIKPPLPRRWTTVLREPWHGMQEIRP	27	0.09	0.13	0.01
510	FSP_AIM1L_1	chr1:26671971	RTGPWTPLLPPSCPW	15	0.1	0.14	0.05
511	FSP_CSTF3_1	chr11:33117910	NMETFQSMSWPILTIFLTSMRTIIPEFCLNEF	32	0.07	0.06	0.02
512	FSP_PEX1_1	chr7:92146721	LGQIIMKKMRRPVCYK	16	0.13	0.13	0.02
513	FSP_TSC22D1_1	chr13:45008838	LPPPSHRAPHSPPPSQHRRAQDQPHSCLCPRRTGCCV	37	0.06	0.02	0.02
514	FSP_IL17RB_1	chr3:53889347	SVSRPEACGIRTSLLVRRMRRQ	22	0.07	0.06	0.04
515	FSP_IFIH1_1	chr2:163134716	LQKKEIAKNVFVQNI	15	0.1	0.06	0.06
516	FSP_SACS_2	chr13:23912864	IIKKNPALPKH	11	0.16	0.09	0.05
517	FSP_PLAGL2_1	chr20:30789952	GFKMQSRRRKWAGN	14	0.15	0.07	0.02
518	FSP_HDAC2_1	chr6:114292040	SATTTTVILEIIIMDRVIP	19	0.06	0	0.05
519	FSP_GPR161_1	chr1:168054869	AASGAAEAAELL	12	0.09	0.08	0.02
520	FSP_EML6_2	chr2:55176077	ITKKRNWLRSWL	12	0.12	0.01	0.03
521	FSP_FGF7_1	chr15:49776644	RRKNKKQPTFFLWQ	14	0.04	0.06	0.02
522	FSP_ESCO1_1	chr18:19154750	VTIRIQKQKFRILKRI	16	0.09	0.02	0.01
523	FSP_TWISTNB_1	chr7:19738024	RKENTVKRPNLPHL	14	0.04	0.07	0.01
524	FSP_MTF2_1	chr1:93599280	IEKKERKNL	9	0.06	0.09	0.02
525	FSP_SLC22A4_1	chr5:131676327	LTLFSLKVWE	10	0.07	0.06	0.02
526	FSP_GCC2_1	chr2:109086477	ILIVCRKSFYS	11	0	0.08	0.01
527	FSP_POP1_1	chr8:99168468	LISHLMKWAHP	11	0.04	0.06	0
528	FSP_TMEM41A_1	chr3:185212518	SLFFSYCF	8	0.03	0.06	0.01
529	FSP_GRIK2_1	chr6:102503432	TLNWKRNLLFG	11	0.32	0.31	0.05
530	FSP_GRIK2_2	chr6:102503432	TLNWKRGPSVVPW	13	0.32	0.31	0.05
531	FSP_GRIK2_3	chr6:102503432	TLNWKREPRLSYLKTMYSSLFWSQFPFLQCCHHHHLHHHYHHVLNKYI	48	0.32	0.31	0.05
532	FSP_NOD2_1	chr16:50745399	QTQLPKVWDPVFFGAASPPSCTWADWLCGAWACAATCSQPSSSRQHRSALMTFLLASWCVPKVSCQGVRRPWNSLPRSTWHSVLMCHQLCSDTSSIVAGQATHQWPGSCPRCASRPRRERTAAWQLCCRRPSRTTFRSQQPSWQGCCPGSTGACWLSARHLRRPCSGARPVPAGVWPAASASTSTPSRQLHRVRPRACMPCPGSSGSSGACTRCRRSGWLGRLHVA	226	0.07	0.07	0.03
533	FSP_SRCAP_1	chr16:30736371	HHLVPLFIWTPWRKSGSGSGLNAWNGFSNLVRLMGPWHLCMGLKSWISVPCPNLLPAPSALVLLAPATPPFGLIPRLPTGLYCFPSSD	88	0.22	0.09	0.01
534	FSP_RTKN2_1	chr10:63958149	LKRQMGSSLLVSMKNPYHLLGPHSLMVTIKWSSRKRYCILQVSHYMMKKGKRDKLPFLLLINFHSA	66	0.13	0.15	0.07
535	FSP_CDC14A_1	chr1:100889837	IFHSGMLPLEIALTISPFSTVCRESERDYNMDFLTLRHLMWMNMNIMSELKMVTSTGLFQENF	63	0.13	0.13	0.03
536	FSP_LRRC41_1	chr1:46752129	PMFYVGPLMCLLTGVFVISGSHLFCTAPAMSDSSPSVTCCRVQPSWWLSPTAGFWRPWPAPCTLSSSATCCSLMWLLSSHFGSCCISSFTMGLSVKCRYTPGLCLSQPFSSLFSP	115	0.09	0.05	0.01
537	FSP_MICAL3_1	chr22:18300932	GSLLSPPERRCGSRLWRAWRRFPLLMMWRTPMTTRLRTQACRRNSSRPRPAGRAPRSLATRPWPRRTGGCLLWRGRCSHRRGGCPWCPRKPRSWPRSACEPGRSP	105	0.13	0.02	0.01
538	FSP_RAVER1_1	chr19:10433828	SRASWVPPQPCRCSMGQPCPRRCCSSPCRPRARRSPASWETHPWAPSSLGPSQPTPSSGSCLQEGACPRSCRPGEGSHHPCCHPCLALLGVTGRPWAWVPQRLWGSEALASEASRKTVGLCRRPLGSHCWGSPPRTTGFP	140	0.06	0.02	0.01
539	FSP_RGL2_1	chr6:33263965	AALTSSAISGPGWTPRPPTFLSPWPSPAIPLLTPRMSWCSSLTTWPNS	48	0.09	0.11	0.04
540	FSP_CLASRP_1	chr19:45556129	LCSPPSPQNRSRTNGSVTTSATEAWCRTTLPASQRSSACTRSTLMSCTEASRDPAKMRRRSWQRRRLPSVIPTRTARWPR	80	0.06	0.04	0.04
541	FSP_AFG3L2_1	chr18:12370885	LVNLKKLWERKKNQSQLLPHALLEEEVVAVENEVARKMILTGGPGFRRVTFHGTTRISGCSSSGLLCSGVESCFTCCSRDPGEKSLGRTLSITIFQKE	98	0.06	0.04	0.02
542	FSP_RAB42_1	chr1:28920547	VSGSPPAGSSTQAHASVDSRRERVKAVPALAHLVGWGVLISLWRTNDRRVHINSILTQSCFLDFGVEAFYRKESSDVILAFLEAKDSGSPEVRGSRPAWPTW	102	0.03	0.06	0.01
543	FSP_ZBTB41_1	chr1:197145703	YIQVKKLISVKNVENVLVVGIISLFITKAYTLERKCGKNIKQHFINVMFVRKFLKANQVWKCIFERIQVKNHTSVKFAISLLELRKH	87	0.06	0.04	0.02
544	FSP_HNF1A_1	chr12:121432118	QGQARDLRCPLTAPLACLHLPSPPVRSTVCAMDSLRPVRLQKYPQAAAVP	50	0.07	0.06	0.04
545	FSP_ZC3H3_1	chr8:144621235	ASLLSRSSMSLVRTWSSKLNRHQSLALPVPQGPSGALWKNLRKPPGVTKGPGKVKVSPLGDSCSPRGQQEPGGPAVWKILFWSARRSLVSPGW	93	0.01	0.07	0.01
546	FSP_GLI3_1	chr7:42005573	RRWPRPRRSAVSCFRITRGPRAASPETSTRPPVLPASPRTSPWSP	45	0.06	0.08	0.03
547	FSP_ZFHX3_1	chr16:72991758	SRSSATLPGRRRRRWLRRRRQPISVAPAGPPRRPNQKPNPPGGARCVIMRPTWPGTSAFT	60	0	0.04	0.05
548	FSP_CBX5_1	chr12:54645832	RESRAMISLGALREDWNQKRSLGQQIPVVI	30	0.12	0.14	0.02
549	FSP_PRPF4B_1	chr6:4031881	RSINTEVNIRNINIPQKKTRIKNINISINIRNTKEKRLLMLLIKRVCLQQKELNLMI	57	0.07	0.08	0
550	FSP_GABRD_1	chr1:1961598	ASVPGSGPSTQTPLTFTPALCSLRRLRPSMSSTGRHTPCEHRTQATLACPGARRQLPRNFLGERALGLPSPLRVSKWDDSRPRKTRGSLGLPEL	94	0	0.06	0.01
551	FSP_GAS6_1	chr13:114523858	WSPPQPRPPRDAAGFSVSVRDSREEPGGSSPRGAMLRAGLSSVTIPACNISVNSEMDLGPLTPRTQPWARARGRRK	76	0.06	0.02	0.01
552	FSP_ASAH2_1	chr10:52005194	QPPKALQPPRAPQLPNAPQPPSIPQPPRAPQPLKLLQCL	39	0.1	0.04	0.03
553	FSP_GYLTL1B_1	chr11:45948373	GLTMSPLWPSCPWTGCRCWKPCAGTGLAP	29	0.04	0.12	0.03
554	FSP_ZNF416_1	chr19:58084579	TLESALEKGFMNLANVGKPAAVSAPLFSCKESAVNVGNLLAKPLI	45	0.07	0.05	0.01
555	FSP_NRD1_1	chr1:52305912	LLKNSLQRLFVLELGVSLIQMTCRGWHTFWSTWYSWVV	38	0.06	0.02	0.02
556	FSP_NRD1_2	chr1:52305912	LLKNSNCRACFCCGQS	16	0.06	0.02	0.02
557	FSP_RAPH1_1	chr2:204305619	HLLLSLHPSLPKLPQNPL	18	0.13	0.2	0.01
558	FSP_CBLL1_1	chr7:107395909	REIRCVQAVVILCSELSSVHEVLSSCVALFKGAREHICLRETYRLISTIAI	51	0.03	0.06	0.01
559	FSP_ZC3H13_1	chr13:46543661	NVKNPKVILIFLMKKQPSKVRRKEAHGLPL	30	0.07	0.08	0.02
560	FSP_EPS8L3_1	chr1:110300580	TRTREVSPRHSTLTASRRSSTASTSWEGWPPG	32	0.09	0.08	0.01
561	FSP_CLEC4A_1	chr12:8281937	ICPWKRQPGAVAQRIGSHLVPTATLFLLNQHLGKTVRRTVLEWRLTCW	48	0.06	0.01	0.02
562	FSP_PPL_1	chr16:4944500	QTLRPWLWLTAWAASTGACGRRQLGANARCSSGMRC	36	0.1	0.05	0.01
563	FSP_AKAP13_1	chr15:86287017	RRTKPAALSPVMVPRQKYQQRVKRSSADPLPLC	33	0.01	0.08	0.03
564	FSP_ZNF330_1	chr4:142143532	RLVRGRRLRTAENVKNN	17	0.15	0.14	0.02
565	FSP_SMARCC2_1	chr12:56559113	LDPMAPHRSPTNKLLPQ	17	0.12	0.12	0.04
566	FSP_TCHP_1	chr12:110344435	NSKKPPQSKRTNGMKMNMKGPEGRR	25	0.06	0.08	0.03
567	FSP_FBN2_1	chr5:127610311	LPVNVHLVSHSITLLVSTTTNVGLNLRFVEQRESVKTLQAVSAVNAKEGSLLMPPD	56	0.06	0.02	0.01
568	FSP_FANK1_1	chr10:127697969	SRGQRSLVSADESTTHLRNARKTK	24	0.1	0.08	0.01
569	FSP_CEP290_1	chr12:88512305	FVKWLKKEEKEVQLQD	16	0.22	0.01	0.04
570	FSP_XRN1_1	chr3:142030643	GLQTKRTLRIRKPRVLKPLQFRLASQILPTLSK	33	0.1	0.02	0.01
571	FSP_CASD1_1	chr7:94174999	QTEIVSGILAYC	12	0.19	0.11	0.04
572	FSP_RGS9BP_1	chr19:33167776	VATPGRPWPPSFSAPCCWRLWP	22	0.04	0.14	0.01
573	FSP_AQP7_1	chr9:33385690	ASSPSLLVGANRSSAMGRTGGGCQWWHHFWVPI	33	0.06	0.02	0.02
574	FSP_UNC79_1	chr14:94088050	SYALSNKNLLI	11	0.15	0.19	0.02
575	FSP_KANSL1L_2	chr2:211018375	MALHGVQLRKSKDLHFLLQGCCLMLKRVWIPMQLIAALMTIWMNIPLEKMWQLTVVLNGSGL	62	0.06	0	0.01
576	FSP_NOVA1_1	chr14:27066542	LKPAAPRGPIRAKTASIF	18	0.17	0	0.03
577	FSP_PTEN_1	chr10:89717770	KMLKRTKCFTFG	12	0.1	0.11	0.05
578	FSP_NOP58_1	chr2:203168133	RERTRINRKELRLYHPDTHHA	21	0.06	0.06	0.03
579	FSP_VPS37B_1	chr12:123351892	RIPPHHPRCLRDA	13	0.12	0.13	0.02
580	FSP_MAP7D1_1	chr1:36636626	HHHQCQPWSPTLPRTPLLP	19	0.07	0.08	0.02
581	FSP_NAA15_1	chr4:140291445	MQKKKSSREIRKRRRMMMMRR	21	0.09	0.05	0.02
582	FSP_PCCA_1	chr13:100925452	WMRRLEERWENKL	13	0.07	0.08	0.04
583	FSP_RBM26_1	chr13:79918807	AQKKNRRH	8	0.16	0.15	0.04
584	FSP_ATP2A1_2	chr16:28909714	RSERKWSWMTLPGSWSMRRT	20	0.06	0.02	0.04
585	FSP_LARP7_1	chr4:113570754	SLKKQYPK	8	0.22	0.09	0.04
586	FSP_CHD1_1	chr5:98206409	KLFLVREVQRGEKQELRRIKQ	21	0.04	0.06	0.02
587	FSP_AVPR1A_1	chr12:63541343	LVAISFKTVFKASHAAKT	18	0.09	0.06	0.01
588	FSP_ZC3H6_1	chr2:113060881	ELVSTGIMTFHLLSVDIYQEAT	22	0.07	0.04	0.01
589	FSP_CAMSAP2_1	chr1:200822549	NSDQNLFTEIILNPPKHQ	18	0.03	0.08	0.01
590	FSP_WNK1_1	chr12:970297	SRKRAVSNSR	10	0.09	0.12	0.02
591	FSP_CD93_2	chr20:23065992	MAPSSAAADQDSGCWMTW	18	0.03	0.06	0.02
592	FSP_XRN1_1	chr3:142142409	HNGYVLQKKLHFTFYTCL	18	0.01	0.07	0.02
593	FSP_NCAPD3_1	chr11:134048586	QPPPRSEVLSCPL	13	0.06	0.08	0.01
594	FSP_PLXNA1_1	chr3:126735391	RALAALPSSSTLR	13	0.04	0.07	0.02
595	FSP_MAP3K4_1	chr6:161469776	DHKKMYSAHSC	11	0.12	0.06	0.01
596	FSP_ZCCHC11_1	chr1:52991780	SSKKISKMIFV	11	0.04	0.07	0.04
597	FSP_C20orf85_1	chr20:56735727	QSHRPPRASSAGDLQCQA	18	0.07	0.02	0.02
598	FSP_SLC4A3_1	chr2:220504282	SVGCLGCPGSRLPRSAPSPMSMR	23	0.01	0.06	0.01
599	FSP_VRK2_1	chr2:58373509	STVREALSPVQHGKCRKRRN	20	0.06	0.01	0.02
600	FSP_HDLBP_1	chr2:242179467	AAKFARCATALEHVSSSLRLRTRTRT	26	0	0.06	0.01
601	FSP_RUSC2_1	chr9:35547974	TSALDVSAPAAMIAACSAALLSAWARWNVC	30	0	0.06	0
602	FSP_BAZ1A_1	chr14:35331423	QDRIFRVFQNH	11	0.07	0.07	0.01
603	FSP_RNF25_1	chr2:219529514	ETDTSSAFSSLLPLRNLSQL	20	0.06	0.01	0.01
604	FSP_TBL1XR1_1	chr3:176769342	MEKTQQMGRRMEHIL	15	0.01	0.06	0.02
605	FSP_MAP9_1	chr4:156273869	RKLFSSKRKKKK	12	0.09	0.05	0.01
606	FSP_MATN3_1	chr2:20200211	ADKKHVQSVTSVP	13	0.06	0.06	0.01
607	FSP_SDAD1_1	chr4:76891521	RRKNQRCLTFQPFT	14	0.03	0.06	0.01
608	FSP_UBA6_1	chr4:68530907	KTVFLNHWRGS	11	0.06	0.02	0.03
609	FSP_TRMT6_1	chr20:5924808	KKKKNMKPSLLL	12	0.07	0.05	0.01
610	FSP_MFSD9_1	chr2:103334978	CGPPAWALC	9	0.03	0.09	0.02
611	FSP_ABCC4_2	chr13:95735432	RRYFWKRQEM	10	0.03	0.07	0.02
612	FSP_SAFB2_2	chr19:5590343	DGWGATAPTRG	11	0.07	0.04	0.01
613	FSP_ASH1L_2	chr1:155448996	RGGILLSMFL	10	0.09	0.01	0.02
614	FSP_BRPF3_1	chr6:36181729	QESPRSPLL	9	0.06	0.06	0.02
615	FSP_KRCC1_1	chr2:88327536	KRKKAARKLT	10	0.06	0.05	0.01
616	FSP_C5orf42_1	chr5:37226878	THFFTFFNL	9	0.09	0	0.03
617	FSP_EPHX2_1	chr8:27364393	EVVFWMTSGLI	11	0.09	0.01	0.01
618	FSP_CYLD_1	chr16:50825519	MRKLAFPQFSSC	12	0.06	0.01	0.01
619	FSP_THAP9_1	chr4:83827648	VSKKDLSP	8	0.058	0	0.02
620	FSP_NSUN6_1	chr10:18834895	SIGFLLQNL	9	0.06	0.01	0.01
621	FSP_USP9X_1	chrX:41089035	EVKKPPVCSR	10	0.06	0	0.01
622	FSP_KIAA2018_1	chr3:113380090	LLFIPTGISLVETAREQLFRG	21	0.2	0.08	0.05
623	FSP_CR2_1	chr1:207642044	AVPPHVKRHAVNL	13	0.13	0.13	0.05
624	FSP_FLCN_1	chr17:17119709	TCSPQSLLSSWRSTQPHVPPSTLWGVRMTSLSASTSLW	38	0.16	0.09	0.01
625	FSP_CEP162_1	chr6:84896233	VNLFLTKMMRM	11	0.25	0.11	0.04
626	FSP_RTTN_1	chr18:67697249	ALKKRRMVLLKS	12	0.19	0.14	0.01
627	FSP_GIGYF1_1	chr7:100285170	WLAPPEAGAARGAEAAAVVTAAFTKEASKKAMGPLDEAPGKSSAARAGMTEARGGLRSQQGGMEHDVALRREGLAQGRSTPAQTARTGAPYGRNRRRRRRAAGGSEQGPGETATAGAPPALMVVPALLAGGNMGNGGASLNLICEGIEEGVVKRRGGEGEAALTCGGAERLKALRRTRMGSQSGAWTMRMKKWAPLMPLGPSCLSRRAPRSPFLRSRSWTSKGWRRRRNLPKG	233	0.13	0.08	0.04
628	FSP_OSBPL1A_1	chr18:21745097	NDLRKNKEQPAKTGPSQKRTGRRGGSIKVLIPTMEHRTGFTLAATGTEITSICLTFIKMHTSQGVWLIYK	70	0.16	0.12	0.04
629	FSP_PPP1R10_1	chr6:30572795	YCHLRLPSQAPLKGKRAQNQAQPNLLPQNQHHLLRQWTQTVQAPRFPLLKSRSSWIQPLWSQELWMPSQWRVLEILTN	78	0.07	0.09	0.02
630	FSP_ZNF462_1	chr9:109689491	HNPRHQTSVLSFTTANTVPTAIGQLWECLSTTRKDTQK	38	0.16	0.09	0.02
631	FSP_SMARCAD1_1	chr4:95173910	MFLIQRELLKTLNMIQVLMSVVH	23	0.16	0.06	0.03
632	FSP_MRI1_1	chr19:13882968	TTSSLVASSQNWGQP	15	0.1	0.05	0.04
633	FSP_IKZF5_1	chr10:124758127	MGEKNQSLWTS	11	0.07	0.06	0.03
634	FSP_CCDC168_1	chr13:103381996	LPVYRQTHWRLYPKPFAGLFPLKP	24	0.55	0	0.25
635	FSP_WDR90_1	chr16:709106	QPARQARAQDRWRTQRPGPASSPGSRSPSHVRHLHHGWASVPGLPKVAMAPGTPGIRGPHAPPTWLPARPSRLPGSAAAPTLPRALARLPPAVGGCV	97	0.04	0.06	0.01
636	FSP_DNAJB7_1	chr22:41257115	RSVKRCKRSLPKGIVKLTLQIYNI	24	0.12	0.07	0
637	FSP_LRRK2_1	chr12:40713870	GNFQRTTCHSILSS	14	0.12	0.12	0.02
638	FSP_SACS_1	chr13:23914687	LKPYRSVLVLIKMFF	15	0.06	0.13	0.03
639	FSP_EIF3J_1	chr15:44843099	DEKKRKQK	8	0.25	0.14	0.04
640	FSP_CPVL_1	chr7:29070262	FGRSLNLTVKWLVTSGKRVTSIR	23	0.09	0.04	0.02
641	FSP_ANXA13_1	chr8:124707762	SWCLCCRLIAMKEMTWTKI	19	0.09	0.04	0.02
642	FSP_TMEM255B_1	chr13:114514859	KPPPTHPDRGVE	12	0.01	0.06	0
643	FSP_DLGAP3_1	chr1:35365852	VTPPVARMGRSPTSKPWGMRRAETQTAAPRHLPKQSPDASPPVAPPAWTRPGSTAVSHPGSTPGAPSLATAVPSPLDSSAMS	82	0.04	0.08	0.02
644	FSP_C9orf131_1	chr9:35043650	ANPQLLCQNPEKLALKEDLLYLRTSGEPWDTERNLRPLSLQCQSLALP	48	0.13	0.17	0.08
645	FSP_HOXB3_1	chr17:46629737	NPHFRPPRTWRATTSAQLARCSPWATLPHMPRARSSTAAA	40	0.13	0.13	0.04
646	FSP_IRS1_1	chr2:227661664	TTAQTAPPSTRMMATCPCPQGWPQCPVAERAVETICP	37	0.16	0.18	0.01
647	FSP_FOXN3_1	chr14:89878534	HPLPTLTCPTMPGRTPTANPPTPSAASYLWPSRTLQPSACQ	41	0.12	0.07	0.04
648	FSP_MECOM_1	chr3:168833257	EATSNQDLLQMVPCSMQDPLLSLWTLFTE	29	0.28	0.04	0
649	FSP_MCPH1_2	chr8:6289099	NVNVCSPKILILKHQKMIRDFRRNLRKWLKSYKGKKQI	38	0.09	0.08	0.02
650	FSP_LRP12_1	chr8:105509429	ANQEISIVKTIVVCLKVGCVILKMTVVMAAMKKIAQ	36	0.04	0.08	0.02
651	FSP_WNT16_1	chr7:120971879	AAPMMSSMACGSAESS	16	0.13	0.14	0.04
652	FSP_IQCE_1	chr7:2641075	RLFWMRRLWCFRQLSGDISRGQSS	24	0.06	0.07	0.01
653	FSP_PCDHGC3_1	chr5:140857742	EQKKISPFIYFFL	13	0.13	0.08	0.01
654	FSP_APIP_1	chr11:34910341	KLKKASVLLFS	11	0.1	0.07	0.03
655	FSP_DYRK4_1	chr12:4719362	DTQIPRTSRWC	11	0.03	0.11	0.02
656	FSP_POTEE_1	chr2:132021078	SVKKRMIIF	9	0.1	0.06	0.02
657	FSP_SULF1_1	chr8:70514026	RVPFLFVVQV	10	0.04	0.12	0
658	FSP_LGALS9_1	chr17:25975972	LEVGATSS	8	0.06	0.04	0.01
659	FSP_NCOR2_1	chr12:124848228	SRSPKSMSPPGRTQLPPSQLPQPHRHRKTCSRRATPLSSLAAAPGARAGARHPPPTRRQRSLCSSQPSQPRPRSCLGTPLAGLPACPSPCPPVR	94	0.09	0.02	0.03
660	FSP_NCOR2_2	chr12:124848228	RHPPPTRRPSQPRPRSCLGTPLAGLPACPSPCPPVR	36	0.09	0.02	0.03
661	FSP_OBSCN_1	chr1:228559450	PLSGTWGTLRAPSSFHPLVATQALLSQRGHPRTALGGSQPLSPRRAAAPTQQLPHALLAPSLQDLAKRPP	70	0.13	0.02	0.01
662	FSP_MVK_1	chr12:110019240	RAWAPAPPTRCVWQQPS	17	0.28	0.14	0.05
663	FSP_DAPK1_1	chr9:90321802	TRKASAASCASGVTTSTHRPASAWTSMHQT	30	0.06	0.12	0.02
664	FSP_MEGF8_1	chr19:42838298	VLTVACRSAQPPRPWDHAAPVTCTCGRTRGLGGGTT	36	0.03	0.07	0.04
665	FSP_JMJD1C_1	chr10:64952699	KTKNLPLKTKLKKKENKTTLNLQMAEHHLLCPRIMNKAQPYGIC	44	0.03	0.07	0.02
666	FSP_RNF111_1	chr15:59376343	HPIHIGCTQTMVMGIIFMCLRLCPHILDRLQRGLPGNWELKLE	43	0.07	0.06	0.01
667	FSP_EPPK1_1	chr8:144941378	VSSTHSTTTGSHWKQPTDGAVCTRTSMRSFPTRST	35	0.01	0.08	0.03
668	FSP_TLR10_1	chr4:38774956	HTWNGPRIGVNVGFSGQTFELLLMLMY	27	0.07	0.08	0.01
669	FSP_RAPGEF5_1	chr7:22197474	RIKPFSTNSVLRRTGSSIEEL	21	0.06	0.12	0.02
670	FSP_ZNF638_1	chr2:71650549	VTWMKRRRRNLILRKPEWIFK	21	0.07	0.07	0.01
671	FSP_ZNF644_1	chr1:91406040	LEKKESEKWM	10	0.15	0.08	0.05
672	FSP_KANSL1_1	chr17:44248731	VSNWRVKSLPCLPFFSVL	18	0.07	0.04	0.02
673	FSP_POLM_1	chr7:44120414	GCTPQLCWT	9	0.12	0.09	0.02
674	FSP_RASA2_1	chr3:141326548	TFLLWKNWKRALSTRKICSK	20	0.07	0.02	0.01
675	FSP_ZUFSP_1	chr6:116967058	EEKKTEHYAY	10	0.12	0.04	0.03
676	FSP_ABCB6_1	chr2:220081103	FLQGVALAVQAS	12	0.03	0.07	0.02
677	FSP_DSTN_1	chr20:17581680	LMFFCGHQN	9	0.04	0.08	0.01
678	FSP_IWS1_1	chr2:128238676	IRKKADLHTQ	10	0.03	0.07	0.01
679	FSP_ATP2A1_1	chr16:28913640	GAPRSPSSVAGSSSATWQSGAMWVQPPWEQLPGGSCTLRMGLMSTTAS	48	0.1	0.11	0.06
680	FSP_CPAMD8_1	chr19:17039884	IRTPGHGSPPARWESPWPVHTRPRSSPGMNSEHSGSAGVVALSRLAMVQSHPMSLSLWPGPSRGHQRSSSLAFPPAGAPWVNSESGGRWRWTRATARPSPWGSHTAPSLGLSEPPPPSSGTSWGQP	126	0.06	0.01	0.01
681	FSP_SLC27A3_1	chr1:153751860	TLWTLCSSTPTCLRTCHLMRSLWPPQRPSNSRKFGWQMRASTPAPCLTHCTFWTRL	56	0.01	0.11	0.02
682	FSP_SCAF1_1	chr19:50158042	PPPGWLPRLTRERAAAALRAVGTQISI	27	0.15	0.14	0.01
683	FSP_PNISR_1	chr6:99849343	SIKKKKNKEGVGREVLVVVVPVAIAELVVLVVLSLALHTVLAQVVLLKGKRDTVGVDLQQSKLDVAGVEAILAELK	76	0.07	0.02	0.01
684	FSP_NKTR_1	chr3:42679036	LQDGSLDRNLGSPLMSEFRK	20	0.13	0.15	0.02
685	FSP_LIAS_1	chr4:39462464	RNSYRMDQTFKILYLVILQTGAPGMNIKET	30	0.09	0.07	0.02
686	FSP_WDR7_1	chr18:54358513	TLSHQIKSSFGQKMGKVIFTNYLPVAFQLVIHSAVMWGRQLKI	43	0	0.11	0.01
687	FSP_IPO11_1	chr5:61847115	LHYLMRWPINLIRRWTSFWEI	21	0.07	0.05	0.07
688	FSP_AGGF1_1	chr5:76358967	TGTKHESGLLKTSQKLSLKKMTQGPCLG	28	0.12	0.06	0.01
689	FSP_FAM214B_1	chr9:35108148	RHPPGSTRYPSFPLRLVPLSLIGP	24	0.07	0.06	0.04
690	FSP_PDE3A_1	chr12:20522723	KRSSRLGWASGRITYSHSPPRGWCSAAWPPRHGWC	35	0.04	0.06	0.01
691	FSP_MARVELD3_1	chr16:71668442	TSRPCTSTSTTSLLPMALLCVKRGRRCTKAKATAVSAAVSTEQI	44	0.01	0.06	0.01
692	FSP_CTSC_1	chr11:88068108	WFAFLSIKKRAAR	13	0	0.08	0.01
693	FSP_CTSC_2	chr11:88068108	LRMSLILSVICSCSWELWGYMICHI	25	0	0.08	0.01
694	FSP_TLE1_1	chr9:84208132	TPSSDPESPGMLARSTPSTTGRWCAL	26	0.01	0.06	0.03
695	FSP_SASS6_1	chr1:100588802	YITLLYLRKIFKV	13	0.15	0.09	0.01
696	FSP_OSMR_1	chr5:38923329	QDTLRNLLLQTTLTCWWIH	19	0.1	0.04	0.02
697	FSP_KLF3_2	chr4:38690460	NTHPLLQACSPSACRCPCHQ	20	0.03	0.09	0.01
698	FSP_FNIP1_1	chr5:131007941	NLQIRRLPRQRLLS	14	0.12	0.07	0.02
699	FSP_YLPM1_1	chr14:75265533	CIHITGMSLLGLHGTMEKSEGMKSFH	26	0.03	0.06	0.01
700	FSP_ANK3_1	chr10:62149221	GNTANGPGIGRKSLMPMQVT	20	0.09	0.02	0.02
701	FSP_LRRC31_1	chr3:169557805	EAFTLTMVGFSKLISHVLLSYKPFSKGKEHERIPES	36	0.06	0.01	0.01
702	FSP_PAMR1_1	chr11:35513670	GSWGVPWMTSM	11	0.01	0.11	0.04
703	FSP_OAS2_1	chr12:113442830	TSGTKSSRKSMNS	13	0.07	0.04	0.04
704	FSP_CLMN_1	chr14:95662949	SSKKRKKGNMWTT	13	0.09	0.05	0.02
705	FSP_ZNF142_1	chr2:219508084	DVAGEENEGPPRPSLMCPR	19	0.07	0.02	0.01
706	FSP_FBXO21_1	chr12:117624320	PEIFLRMNWCVS	12	0.09	0.05	0.02
707	FSP_TRPA1_1	chr8:72958792	HLHRMLYMNRLQPSTQWYKITA	22	0.06	0.04	0.01
708	FSP_TOP2A_1	chr17:38546381	GLPQKELKGIQL	12	0.06	0.07	0.01
709	FSP_KRR1_1	chr12:75893593	KKKKSNIPKTP	11	0.1	0.05	0.01
710	FSP_KIFAP3_1	chr1:170004605	VSPAFLNFMDLLLTIKLELCV	21	0.06	0.02	0
711	FSP_VPS33A_2	chr12:122748169	NIIFLSDPG	9	0.09	0.04	0.03
712	FSP_ZC3H18_2	chr16:88694459	SPSRAHLWPTRRSS	14	0.01	0.08	0.01
713	FSP_PRPF4B_2	chr6:4052975	NMVKMLVFILKL	12	0.06	0.04	0.02
714	FSP_INTU_1	chr4:128564917	IAMTMDQYPF	10	0.03	0.07	0.02
715	FSP_NOX5_1	chr15:69331226	PPFFTIDLVTTCI	13	0.09	0.06	0.02
716	FSP_CDKL2_1	chr4:76539580	CKKKNDGT	8	0.07	0.04	0.03
717	FSP_DNAH5_1	chr5:13701426	MTGFLTPRDF	10	0.03	0.06	0.02
718	FSP_EPHA3_1	chr3:89499363	LPPPWTAQLPCIS	13	0.06	0.04	0
719	FSP_PPIG_1	chr2:170493804	RLIEIKVPSQK	11	0	0.08	0.01
720	FSP_NEK1_1	chr4:170359358	GEKKYNVFHMK	11	0.1	0	0
721	FSP_ZNF878_1	chr19:12155504	KAFFLPVR	8	0.06	0.04	0.01
722	FSP_SMTN_1	chr22:31485922	AHPRPPALSLRSLQRSPALRARWSTSFCLAPKRPLLLTPREQTWLDPDPANAPCRCSAPANQPRTESPPPLPADLPHSSGLALCGIVSTSSHLILLWLLGSRMAHPRLP	109	0.07	0.06	0.04
723	FSP_PNPLA7_1	chr9:140356679	STATAPWTSASSTRSAKWATSTGARCLTSGAAAACWRRCSATSRGRARSPRVRSRTLPKLCLWWMTNLTTRRSTRRSCWTSPGMHTQTSRAPQPSRAQTWRTSPHCGIDTPVWLSQNCLRAPLTRTGRGLC	131	0.01	0.09	0.01
724	FSP_B4GALNT4_1	chr11:380921	VKTGSSWTGSCRQGWRWSGSDCGISITTTTPRGACGASAAGRALARGRLEDGQPLPAPVGVPRQLLGAGL	70	0.13	0.04	0.04
725	FSP_STRADA_1	chr17:61781804	SATRMPGPVPAPS	13	0.04	0.06	0.02
726	FSP_STRADA_2	chr17:61781804	GPPTAQCQHPPEPLFLQADQATCLRGFARIASSCHPHHQF	40	0.04	0.06	0.02
727	FSP_STRADA_3	chr17:61781804	GPPTVTRPPTPTTEPSPPTSTTLWSSAFSATRMPGIPAGLGLGFGRAEGAQEGKARV	57	0.04	0.06	0.02
728	FSP_ZBTB7C_1	chr18:45567085	TGGRRMTRRTMTTTKMMMMRRTKRRRRKRRRMTMMTRRTLLTKKTCLTPRTSAATKALPRQTISQRRPIQTPPGTSLAIWG	81	0.1	0.05	0.02
729	FSP_HERC2_1	chr15:28525215	VPGLRAKVWRGSPEWDPERRCLLPLPSCAGPGDQARMRTSAVSCCRSPWTPCEHFPRPRSCGWRWWRE	68	0.13	0.05	0.01
730	FSP_MAP2K7_1	chr19:7976149	TYGAWASRWWSWQQDS	16	0.03	0.06	0
731	FSP_MAP2K7_2	chr19:7976149	QTPPSRTMTSGPTYGAWASRCPARLPPRWSWQQDSFPTRTARRTLRSSPKSYRKSPRFCPDTWASRGTSSPSSKTALLKITGRDQSIISYLNTWRWTWRPGSRMSWRRLSHRGLAAS	117	0.03	0.06	0
732	FSP_CLASP2_1	chr3:33602361	WVLICLDLFRQKFRKPLMLQESLFQMIFSSIF	32	0.1	0.14	0.03
733	FSP_PHF21A_1	chr11:45955607	LPMPPPPRRPLPPPPRAAQRTVTRGKRLNNRAPLGEATGSRRQGEQNTEDSRKAKPDFWKVQNSFGSLVPEREKMLVPGGTRVCQHAKIGPCYMK	95	0.09	0.01	0.01
734	FSP_SORBS2_1	chr4:186515044	NRFRLCITILPGMKMSWSSEKVMSLMSWKSVMTAGLWGPQEEPNSLVLSPETTSRGCELRSLLL	64	0.06	0.05	0.02
735	FSP_HOXD8_1	chr2:176995417	LLLRILRLRRHLPPAAGLPVTGSPRSFTDTITYRDSRFLRPSKRPSWYNILTVNRPVVILARTQTT	66	0.01	0.09	0.01
736	FSP_SMO_1	chr7:128852004	LPLPPVPFLDCLSCPGRNAWWLQVPGELGTLADRERGPWSPTHSAQSPVPLRIHFCPVHRPPWHGLMAADRAWGLFTPAPT	81	0.09	0	0.01
737	FSP_ZNF48_1	chr16:30409310	DQWCPDGSHLGQPRQLPRDRRPRTSHISALIAARGLCSAAAS	42	0.03	0.08	0.03
738	FSP_MLH3_1	chr14:75514604	NLAIVEEEMFLVMGELNYVPLAL	23	0.12	0.13	0.04
739	FSP_ST8SIA6_1	chr10:17363321	PYFWRTLQPMEMHFFFCQHFPSGPTRVPLSKYTTRSKSLKQDKRFYFSIPST	52	0.16	0.24	0.04
740	FSP_HACD4_1	chr9:21007046	RRCEVQHSSVTREKTGCGFSAVNKTQEVFWWKNTLYLIKIHYMK	44	0.07	0.06	0.01
741	FSP_LARP1_1	chr5:154173390	PQPGNQRSNRSLPGTTRMRHRV	22	0.1	0.13	0.02
742	FSP_ADAM28_1	chr8:24167473	TRTSLHQATRKHIIIPLERRSPQAHKLWMIVIIKDIFLMKRFLTLASAHVGV	52	0.04	0.06	0.01
743	FSP_MEN1_1	chr11:64572093	GSLLGLSLAQPEALKVAARLRCQHPQHHHRRRVQCSLSRVRR	42	0.06	0.07	0.01
744	FSP_ATP13A3_1	chr3:194147850	GSNSNLGMKCGIQNQMLVIQQEAGFGILHT	30	0.07	0.11	0.01
745	FSP_WHSC1_1	chr4:1980559	QSQGGGAGGESQRANSARRPLGRIQGRCRAAGPACGRGRA	40	0.03	0.08	0.01
746	FSP_MCPH1_1	chr8:6302639	PEQLTLPISQQKPSPVLGKLEMVKAVQLRVA	31	0.04	0.11	0.01
747	FSP_DIS3_1	chr13:73337684	FMRNFLNMLCFENILLHLHQIMKFLLRQPGQGIWKLRLIQPSLWLSLWIRPNLLLFHI	58	0.01	0.06	0.01
748	FSP_EVL_1	chr14:100594927	HPQSHLHPLGLPHLPHPHCQTTRAPCQDWPLP	32	0.1	0.06	0
749	FSP_SYT4_1	chr18:40857246	PPAGKNLMKSPQWWGSSVHLAWSSQSLSLHGSAVRENHPSLTRLLHTSLCMCLRELIFTLKT	62	0.09	0.08	0.01
750	FSP_HPS6_1	chr10:103826900	MEYCPPLNSCASVCASWSLDGCHPLWSWHSSRAGRAGGQGAQDCPCIAELWQC	53	0.06	0.01	0.01
751	FSP_TEP1_1	chr14:20846338	LWLWAGWTVWWSCGPGEKGHGWLPSLPTMALLLLRFSCMRVASY	44	0.06	0.04	0.01
752	FSP_TNPO1_1	chr5:72199545	VMPLHHGLTQKMISETCSVRSFMDLKIKLAMKIGGVSLTSFLFP	44	0.07	0	0.02
753	FSP_WNT1_1	chr12:49374348	AAATTLTSAASSAGSSWTPGRRGGTCASS	29	0.17	0.06	0.01
754	FSP_ARHGAP17_1	chr16:24942180	NLLVSTQLGTAASPTQHQQLPR	22	0.07	0.06	0.03
755	FSP_INF2_1	chr14:105174185	WREAWRRSSWPRWTMAWAQHGSPAIGG	27	0.06	0.07	0.01
756	FSP_CARF_1	chr2:203831759	SVSRKAGLVSSTKPLVQLGFTLKRYRSFLNIEFLQTPKLTRKLSEWSRRKLLTC	54	0.07	0	0.01
757	FSP_TNFRSF9_1	chr1:7998254	VVKTVALGHLTIRNVASVDPGQTVLWMESLCL	32	0	0.11	0.01
758	FSP_GLI1_1	chr12:57860075	CHWGAAPGS	9	0.16	0.13	0.07
759	FSP_ZNF44_1	chr19:12384448	GPVYYVCNHMNVSSVLKPSLFTVPI	25	0.04	0.08	0.01
760	FSP_SWAP70_1	chr11:9735070	TSQRIPCSLQKKMHLKYGLFSTFYLRTSIH	30	0.07	0.06	0
761	FSP_TAF1B_1	chr2:10059788	ALQVFSSTGLKRTLIERVSMDTAFRES	27	0.04	0.06	0.02
762	FSP_KIAA0195_1	chr17:73491063	PAPATQAPCMMT	12	0.09	0.18	0.02
763	FSP_NOL6_1	chr9:33464082	KTAKTLCGHRMDPQPRSCSSLWSWQLKPCPC	31	0.06	0.02	0.02
764	FSP_ZNF23_1	chr16:71483562	LVKVQTHISVIPSLESSPLGVQDWGNPSALIQNS	34	0.01	0.06	0.01
765	FSP_TANC2_1	chr17:61497894	LLWEDRAKNTQALPLPLSGEALSIGPALQLKV	32	0.06	0.02	0.01
766	FSP_FAM210A_1	chr18:13681751	RKSLILCKTNLLVFINDSRRHLDSMEKF	28	0.06	0.04	0.01
767	FSP_FAM193A_1	chr4:2698177	WTRSQKGKASLTIGGWRICCSL	22	0.09	0.04	0.01
768	FSP_TNS2_1	chr12:53452903	RHPLQSLHHPPCSLSAATQAIPPR	24	0.04	0.07	0.01
769	FSP_TOP2B_1	chr3:25647591	VRILEISSHFLHILRSQKMIQLNLTVMKKILLLFFHHHLV	40	0.09	0	0
770	FSP_ADAM32_1	chr8:39068767	NLRNQSVAMADWREMKSVIVVLRLNVDLQAVVIFELVY	38	0.09	0	0
771	FSP_TIMP3_1	chr22:33255324	RIKASSMPQTPERQTLPHLTSLPSR	25	0.07	0.04	0.01
772	FSP_KMT2C_2	chr7:151845524	LRTKLCFAPCTNQREFMSKN	20	0.04	0.07	0.01
773	FSP_TTF1_2	chr9:135277541	RKSPVTGNMRHWPCLKDRKQAERPGLICRNPSLLWAWMMKLHNY	44	0.06	0	0.01
774	FSP_FKBP9_1	chr7:33014804	VIPPIQCFILMYF	13	0.12	0.02	0.04
775	FSP_EIF5B_1	chr2:99976805	KEKKSRTLMKMIS	13	0.12	0.07	0.01
776	FSP_PDE1B_1	chr12:54971060	HPLPKMNTTRMGIWISPGAGPGLH	24	0.03	0.06	0.01
777	FSP_RBPJ_1	chr4:26417146	NKWNAMVVLNKG	12	0.07	0.07	0.03
778	FSP_KMT2B_1	chr19:36210764	QRPLPGNGVRKAQNGWCRH	19	0.01	0.08	0.01
779	FSP_SLC16A12_1	chr10:91203598	LWSSRHTSLRITHKRHGSIPL	21	0.09	0.06	0.02
780	FSP_NAPEPLD_1	chr7:102760123	SQEILVIALLLKR	13	0.03	0.11	0.02
781	FSP_CENPH_1	chr5:68492902	TWRKLADSLVCSWIT	15	0.07	0.05	0.02
782	FSP_FBXO34_1	chr14:55818555	CHLVSTCQTIPS	12	0.06	0.09	0.02
783	FSP_MAST2_1	chr1:46494559	LEILRRSSLGR	11	0.06	0.08	0.02
784	FSP_ATG2B_1	chr14:96761299	LENLDSRQKFPFDLIIMANMYQWIRVR	27	0.07	0.01	0
785	FSP_LRRC3B_1	chr3:26751758	LPIMPCWSPCLAGSLW	16	0.07	0.02	0.02
786	FSP_RANBP6_1	chr9:6012690	MSLLQRTVSQQ	11	0.09	0.07	0.01
787	FSP_RGS22_1	chr8:100990178	KQKKNWQS	8	0.25	0.15	0.04
788	FSP_CCDC34_1	chr11:27362973	MLKNVRGNNSKLKYRRKRK	19	0.07	0.01	0.01
789	FSP_KIF13A_1	chr6:17788023	SAIKQRKQRTMWSGKPSLWSSG	22	0.01	0.06	0
790	FSP_GOLGA4_1	chr3:37367468	KEKKLRLAVLVNN	13	0.07	0.05	0.01
791	FSP_TOP3A_1	chr17:18181545	GLASPLAACRLTSP	14	0.06	0.04	0.01
792	FSP_GLTSCR1L_1	chr6:42832627	ISKKQNALAEH	11	0.01	0.07	0.02
793	FSP_EIF5B_2	chr2:99977965	GQKKIRKTSQVLT	13	0.07	0.04	0.01
794	FSP_MMP3_1	chr11:102713563	SEKCRSSLDWR	11	0.01	0.07	0.02
795	FSP_HTT_1	chr4:3133117	EKMCWFRTGM	10	0.03	0.08	0.01
796	FSP_S100A8_1	chr1:153362605	AHKKAMKKATKSS	13	0.06	0.04	0.01
797	FSP_CCDC160_1	chrX:133378875	FTPFLVHKMF	10	0.1	0.02	0.02
798	FSP_JAG2_1	chr14:105614481	AGRAAPAPSPRTAAACPTPV	20	0.07	0	0
799	FSP_ALDH3A1_1	chr17:19641649	VRYPRARPR	9	0.04	0.08	0.01
800	FSP_DNAJC7_1	chr17:40134398	QLLKMRSWN	9	0.07	0.02	0.02
801	FSP_HAUS6_1	chr9:19063047	VIHFKKSKIIW	11	0.03	0.06	0.01
802	FSP_RTN2_1	chr19:45996513	GPTPLLLSSGFY	12	0.01	0.07	0.01
803	FSP_PSMD1_1	chr2:231931680	NQLTRDWKAS	10	0.06	0.02	0.02
804	FSP_TEX15_1	chr8:30703516	LIEEFTHLCSL	11	0.12	0.09	0.02
805	FSP_IFIT1_1	chr10:91163033	AVEKSPHLRWLI	12	0.01	0.07	0
806	FSP_GBP5_1	chr1:89732166	SLPNLKHCLMMS	12	0.06	0.02	0.01
807	FSP_PCED1A_1	chr20:2816204	AGSGSDTQRD	10	0.01	0.06	0.01
808	FSP_PKN2_1	chr1:89206848	TDKKVWLM	8	0.07	0.06	0
809	FSP_CHD9_2	chr16:53348351	IVKKGEEGGRM	11	0.07	0.01	0.01
810	FSP_CDK20_1	chr9:90582463	TSMTSTWTGLLRSRC	15	0.06	0	0.01
811	FSP_SCN11A_1	chr3:38949441	DCQKSHSS	8	0.13	0.13	0.02
812	FSP_ZNF114_1	chr19:48789818	RAFFISHSL	9	0.1	0.11	0.01
813	FSP_CFAP69_1	chr7:89929188	LNQKNSVI	8	0.03	0.06	0.01
814	FSP_MUC4_1	chr3:195487898	QLQKTAPGLNI	11	0.07	0.01	0
815	FSP_ZNF106_2	chr15:42738788	KGKKNVLRLTSC	12	0.06	0	0.01
816	FSP_ASPN_1	chr9:95221949	LKKILQDYQS	10	0.06	0.01	0.01
817	FSP_FBXO21_2	chr12:117615412	FFTTCGNRRS	10	0.06	0.02	0
818	FSP_UNK_1	chr17:73814802	LAQWAPAASPA	11	0.06	0.01	0
819	FSP_MFN2_1	chr1:12052736	LAGRAMGRAP	10	0.06	0	0.01
820	FSP_FIBP_1	chr11:65653077	TGKKNCSI	8	0.01	0.06	0
821	FSP_HS6ST2_1	chrX:131762582	KDLFCRGISL	10	0.06	0	0
822	FSP_MBD6_3	chr12:57921002	GTPPSPVS	8	0.1	0.09	0.04
823	FSP_TTI1_1	chr20:36627613	WQCLEPSRFYVPWEASVVTFFAAGSAKMSCQSWLAP	36	0.07	0.08	0.04
824	FSP_AP2A2_1	chr11:970195	STSASCSSSFSLVMTLTLDTWRL	23	0.09	0.08	0.02
825	FSP_TRIM26_1	chr6:30157254	RPENSQINSSLCNEA	15	0.1	0.06	0.02
826	FSP_COG2_1	chr1:230798959	IRKKRCVY	8	0.07	0.06	0.03
827	FSP_GPR19_1	chr12:12814274	TTLAFQKSLPWPKLLPKTRSMTHLTEKPRKKSLLGPLTQIHQILLSKFSFFQLLCTRD	58	0.16	0.15	0.02
828	FSP_MKI67_1	chr10:129913974	MNLPFGSFMSQ	11	0.03	0.08	0.06
829	FSP_DAB2IP_1	chr9:124536637	PDPPTGIG	8	0.15	0.07	0.04
830	FSP_CASP5_3	chr11:104874011	LCKKIMMRSIQ	11	0.1	0.11	0.04
831	FSP_SLC12A7_1	chr5:1074698	TPRTGGPRCW	10	0.07	0.08	0.03
832	FSP_MYO9A_1	chr15:72190580	PTFFISPNKTH	11	0.09	0.06	0.02
833	FSP_TOP2A_1	chr17:38552642	HKWLKFCLLRVVKESFHE	18	0.07	0.04	0.01
834	FSP_DLGAP3_1	chr1:35370731	VAAPSPGCTLARAPSTPVKTVWATHRARVPPACLLHSWISLKSSCQFNKMASTHYHTSEGQQGQGPGQRQGRALPQSPAVRALAASGTWFILCRSSLPSPTLWRRRGSGTIMGPRLREEVALEETATPARALEAPTPPITTITTTITTTTSPGTARGARARTARGMGGTRPSPQAGGVPMTTWTVIAASWRVGGPLGSLVVPSAWRVQMGPTGT	214	0.13	0.05	0.02
835	FSP_TTF1_1	chr9:135277388	SLRKKRRKSPITRNLRHWPCLKDHKWAVRLGLICRNPGLLWACMVKLQEYQHLLIKTSLRKKRKSPITRNLRQWPCLRASRVHTLKDHRWAVRLGLWKAVQLLKGSRNPTVQRRSSKGHECLVMIFQCPVRTLRAHSLIQ	140	0.12	0.07	0.04
836	FSP_C15orf39_1	chr15:75499804	QHCPPVPGSASLFHRRRTQGHPALHQCLSLTMSSAWPPTVTIWMCRHPRPQLSLTLPQLSLTQPQPPVKVRTKAAGGPCLPRRAPQGVNP	90	0.06	0.05	0.04
837	FSP_CACNA2D3_1	chr3:54596940	LGSIRGLNGNQMRMESLPSTAGTENGTSRQQLLRKTWSF	39	0.06	0.05	0.01
838	FSP_RABGAP1_1	chr9:125861042	TVLSLVTISRFVLS	14	0.09	0.08	0.05
839	FSP_SLC26A7_1	chr8:92352747	NSNIQLMTTRNFWPMASAI	19	0.09	0.04	0.01
840	FSP_DLAT_2	chr11:111896977	WEKKRGTKSMKVT	13	0.06	0.06	0.02
841	FSP_MARCH7_1	chr2:160604680	STFFHEDLVRIP	12	0.03	0.09	0.02
842	FSP_DLAT_1	chr11:111904183	WEKKWVRS	8	0.13	0.09	0.02
843	FSP_THOC1_1	chr18:265348	NVPLTKLSEVF	11	0.12	0.05	0.01
844	FSP_ZBTB7C_3	chr18:45566519	LWDPSRRRTTTVPISTS	17	0.06	0.02	0.02
845	FSP_DOCK10_1	chr2:225738848	LQKKISWNLSL	11	0.12	0.02	0.01
846	FSP_SCLT1_1	chr4:129869675	KEKKQWKKN	9	0.04	0.09	0.02
847	FSP_ENTPD2_1	chr9:139945517	VPLPRSLLRQPVQLRTEPARSSCISTASTTESTPTASSAMAVTRSSRGCWPAPSRPTASTPAGRGAFPPKCCSGMCTSHHAPWPSGPRTSTAVPGSACQGAVTPTSAEIWFLPSPDALSMGSSSPQWLGTLLWTFCGLRWGCPWPPCSSWRQPQ	154	0.06	0.05	0
848	FSP_EAF2_1	chr3:121573659	QELKEAVKFSIVKNNSNNKCGIQPGLPIL	29	0.04	0.07	0.01
849	FSP_PIGO_1	chr9:35091693	VSGSWSLGHPWCCLGL	16	0.07	0.08	0.04
850	FSP_EXOSC9_1	chr4:122723894	LTLNSLRWPLQLSNLAGSQISW	22	0.03	0.07	0.02
851	FSP_TCF12_1	chr15:57489984	SERCLLVCLLSLCKMGPTILLTFGVHQMG	29	0	0.07	0.01
852	FSP_MED25_1	chr19:50333113	RPCWSRCSLRQM	12	0.07	0.05	0.05
853	FSP_CCKBR_1	chr11:6292451	CVGCQFIVPTRGAPLMARVHTEHSRVLLSPSFTC	34	0.06	0.07	0.01
854	FSP_SECISBP2L_1	chr15:49309051	NYRKLYQKQLEKRIKHLCS	19	0.09	0.02	0.01
855	FSP_BRAF_1	chr7:140482927	SATPLPHYLAH	11	0.01	0.07	0.05
856	FSP_GRM8_1	chr7:126173278	TSSLTMESSGH	11	0.06	0.04	0.04
857	FSP_B3GNT5_1	chr3:182987674	LMFFGNQSIITL	12	0.01	0.08	0
858	FSP_OSGEPL1_1	chr2:190626331	LNHQKGKFMNF	11	0.07	0.01	0.01
859	FSP_CYC1_1	chr8:145150876	AIRGLTVASSLPWTTPASGGVSRYISRCAPPATAWTSWPTATWWACATRRMKLRSWLRRWRFKTAPMKMGRCSCGQGSCSTISQNHTPTVRLLELPTTEHCPLTSATSCELGMVVRTTSSPCSRATASHPPGCHCGKVSTSTPTFLARPLPWPLPSTQMS	160	0.04	0.07	0.02
860	FSP_MYCN_1	chr2:16082314	RGRTSGRSLSCCPRPRCRPAVASRSTAPSPRAGSRRCCLRTSCGAARPRRTRSAWGDWVASPPTRSSSRTACGAASPPARSWSAP	85	0.07	0.06	0.01
861	FSP_CSMD3_1	chr8:113241029	LHLYLQDLDFIFINKGLHLKHSIQDVQFMKITMAKQLLKIPCMTPTQSQWKGRRYDLIPT	60	0.16	0.18	0.05
862	FSP_CLSTN3_1	chr12:7310658	HTATKAYTSPHAEGEFCPGETDTPDMGEGLSGNTETKRERGFRTSPPFISKPQRALWSPPCPSPGPPSLTSGLSCSWCAPCTGAGWVGKWAGLQLPFYPQWQLPP	105	0.06	0	0.01
863	FSP_PTCH1_1	chr9:98209617	EKACGHPPTDRAETLLKFLLKGILALAIGPAGALAGPVLTTLGTQRPLPWAAPCPATASPSPL	63	0	0.06	0.02
864	FSP_NFE2L1_1	chr17:46135788	AAARWKACLWPVAPRCSRWPPAILPASTPPSAPPT	35	0.06	0.06	0.01
865	FSP_LTBP2_1	chr14:74967607	TALPRSSSQGSVWQLPGNGLQSQAGALRMIS	31	0.07	0.05	0.02
866	FSP_FXR2_1	chr17:7496122	QQVPGLMKTGPSWMEAWNQMGPT	23	0.06	0.06	0.02
867	FSP_CACNA1H_1	chr16:1270496	ASRWNPLRRTRALRGPPRQRAAAPH	25	0.09	0.06	0
868	FSP_GPR160_1	chr3:169802469	YSYPSSLSVFSVPGYHLYYFR	21	0.09	0.02	0.02
869	FSP_PKD1L1_1	chr7:47955186	IFYIFSWICPPTKKQRHKIQL	21	0.07	0.05	0.01
870	FSP_UHRF1BP1_1	chr6:34839369	SIQHLQAPSPSLWPWNMLC	19	0.03	0.06	0.02
871	FSP_ZFC3H1_1	chr12:72038781	SASKNGNKKNSR	12	0.1	0.07	0.01
872	FSP_CROT_1	chr7:86978480	ESLKNTLNQ	9	0	0.06	0.02
873	FSP_CROT_2	chr7:86978480	NTLNQSPEHATR	12	0	0.06	0.02
874	FSP_DIAPH3_1	chr13:60582734	LTDFFVLWKASGTIQFNCK	19	0.06	0.04	0.01
875	FSP_MDN1_2	chr6:90415853	LAAFLNFVMH	10	0.06	0.08	0.02
876	FSP_SLC16A10_1	chr6:111498763	PPKKFSILPSSR	12	0.06	0.07	0.01
877	FSP_PHAX_1	chr5:125939712	WDQRKRKMGKVISKGNDLSKTG	22	0.06	0.02	0
878	FSP_RTCB_1	chr22:32794006	WASTIRDRCV	10	0.13	0.01	0.02
879	FSP_ZNF540_1	chr19:38102620	CQLIENVPLLL	11	0.06	0.06	0.01
880	FSP_KCNB1_1	chr20:47989891	KTPPGLLRNTQQ	12	0.03	0.07	0.05
881	FSP_MEPCE_1	chr7:100028068	AGARGEIAVM	10	0.01	0.09	0
882	FSP_PODN_1	chr1:53543377	EKIPRGPSAS	10	0.04	0.06	0
883	FSP_EIF2A_1	chr3:150289746	QLPKMAPFMM	10	0.06	0.01	0.02
884	FSP_DGKE_1	chr17:54921519	KDKKQIMKC	9	0.07	0.02	0
885	FSP_EGR1_1	chr5:137803132	TNALTLAQWSPVIAASPSASTQARCATSAAATTSPPTSAPTQAKSPSPATSVEESLPGAMNARGIPRSTCGRRTRKQTKVLWPLRPPPLSLPTRPRLLPLTRPRLLPLIHPRPPPHTHLPAPRPTHPLCTVASPPRRWPPRTPLFPLLSRPRSAASLAPPQGFRT	165	0.09	0.05	0.01
886	FSP_MYEOV_1	chr11:69063724	GAWELGGLARWGPLCTHPQCQVLLLVEDVLCAKWFICPASFNPQNDSMR	49	0.04	0.08	0.01
887	FSP_EML4_1	chr2:42488302	RNLILMIKVHKFLHNLSKYTDKLQKARMLLPPKA	34	0.12	0.04	0.04
888	FSP_KDM2B_1	chr12:122018740	RKQLYIQNALNLSRPHSARLTASDTTRTRTCRTWRRSSASAASAWRRSFAASCTRGTSCTPWRAKISTMSTYREKLSGFP	80	0.07	0.01	0.01
889	FSP_KIF26A_1	chr14:104642560	LPWMVPWGMEALGSWGQTDLTVLGQPGVRALGKWLQWPHPDPAGSPRPGPRGGHPQPRPSTPASPGNRGLPLPPPVWAVLAWARAHLAVEACLRTHGCSG	100	0.06	0.01	0
890	FSP_MAGEL2_1	chr15:23890894	SRPRHRVRKRRCPHCRSSLPGRHRLQSCRPSPDPR	35	0.12	0.02	0.02
891	FSP_RNF43_2	chr17:56448298	APACHWLARLGWRVSEEPVLSSLTSLRIELLLSSCSSRWG	40	0.09	0.05	0.01
892	FSP_NTAN1_2	chr16:15131931	MKMACGKRSLLQEVKKHELPKKAPSWPDRPLVGLARIQIWILHLLGLRPPSLLSVFQMTFIK	62	0.07	0.01	0.01
893	FSP_ZFP36L2_1	chr2:43452512	AAAPRSTPRATRPSCAGPSRRAARASTAKSASSRMASTSCAA	42	0.09	0.02	0.01
894	FSP_C1S_1	chr12:7173239	RAGNFAIMEIQCPALRKTLPILFGSLRRQNMSLEMWCR	38	0.09	0.04	0.01
895	FSP_EPC2_1	chr2:149447829	RVWSFLFLRQRATSTITIACTKESLNSQNSSFIFSLLI	38	0.06	0.07	0.01
896	FSP_PPP1R12A_1	chr12:80201042	KDQRIIKVAPLVEDKMI	17	0.07	0	0.02
897	FSP_PPP1R12A_2	chr12:80201042	IAQLMKDQRIIKVPQIVCGLRIVLRKKRTVFLRQ	34	0.07	0	0.02
898	FSP_HCFC2_1	chr12:104476535	IQDQDQELATVLLQSALDCIFGVEEMATKKH	31	0.09	0.05	0.01
899	FSP_GP1BA_1	chr17:4837373	PSLNLISHQSSVGCSKGIWRAPEMTLFSTPTFAASSPWASMSWVSSGCSLPLWSSSCC	58	0.01	0.06	0
900	FSP_LAMB4_1	chr7:107763584	CTLGGSVTQKLKMTATGVPVIPPLVISWWAGTRSLWLLLPVG	42	0.06	0.01	0.02
901	FSP_KDM7A_1	chr7:139833448	GGTGTDMTTQKLMMVPNQCKLELELSLRNYALESSQVPMK	40	0.03	0.06	0.01
902	FSP_E2F7_1	chr12:77449827	NLLQKEIPLLQLSLLTDSKRNHGHPQLT	28	0.09	0.04	0.01
903	FSP_WISP3_1	chr6:112389434	NVLCKQQNGLPAPEHVGWEYLTG	23	0.17	0.07	0
904	FSP_NBN_1	chr8:90967512	GKGMKKIKKCLHANQQE	17	0.1	0.06	0.02
905	FSP_ANKRD26_1	chr10:27322259	NNLCQRLHWRLRHVIVLI	18	0.06	0.06	0.03
906	FSP_EML6_1	chr2:55138130	EQLFLKLQEANGI	13	0.23	0	0.02
907	FSP_WDR59_1	chr16:74976691	MLTALPPAMTAMCGYGIRGNPVQQWNI	27	0.06	0.04	0.01
908	FSP_CEP152_1	chr15:49036443	LNVTCFVIFRRVRNELQKW	19	0.06	0.05	0.02
909	FSP_IFNGR2_1	chr21:34799292	VIMSITGKKEESNRSKALSEATPFHWIT	28	0.04	0.06	0
910	FSP_AMER1_1	chrX:63412648	LAVSAVTGRARSLGLSKVSSEPGLMST	27	0.06	0.02	0.01
911	FSP_PLEKHA5_1	chr12:19514518	LKTFHMKCFLNLSQME	16	0.09	0.05	0.02
912	FSP_SMC4_1	chr3:160143940	PDKKSRNC	8	0.13	0.11	0.04
913	FSP_STX2_1	chr12:131283100	NIRARQEGN	9	0.06	0.05	0.01
914	FSP_STX2_2	chr12:131283100	LSNIRARQEGKSG	13	0.06	0.05	0.01
915	FSP_SLC4A3_1	chr2:220502413	ARGTSPIRHCSHSSSCSGPSS	21	0.07	0.01	0.02
916	FSP_DYX1C1_1	chr15:55759242	FREKRNYVKKKSKLKKKEKK	20	0.1	0	0.01
917	FSP_PANK1_1	chr10:91359120	SRTALITHTLCCWLTWAQVSAF	22	0.06	0.04	0.01
918	FSP_AGAP1_1	chr2:236649677	RRRSLPCGWTLLYLSSAWRMK	21	0.06	0.05	0
919	FSP_PRSS36_1	chr16:31151942	LRPPWPSWS	9	0.03	0.13	0.02
920	FSP_TUBGCP2_1	chr10:135111566	IQASTSPSSQHGCMRDLP	18	0.06	0.05	0
921	FSP_HELLS_1	chr10:96352051	EVTRCCFFHK	10	0.09	0.07	0.01
922	FSP_SLC10A6_1	chr4:87769943	APSLTFSPSGLMEIWISASV	20	0.03	0.06	0.01
923	FSP_KCTD3_1	chr1:215793922	VILQVRSTACENSPK	15	0.07	0.02	0.01
924	FSP_WDR72_1	chr15:53908071	ISKKCSLSHQEK	12	0.07	0.02	0.02
925	FSP_KATNBL1_1	chr15:34444996	LRFLRTMKQWPKFCSAGI	18	0.06	0.02	0.01
926	FSP_KMT2E_1	chr7:104746985	TPLKNEDFISC	11	0.09	0.06	0
927	FSP_CLEC16A_1	chr16:11141159	WTCLKMSIGA	10	0.09	0.04	0.02
928	FSP_SAFB_1	chr19:5667115	DGWGAMALTRG	11	0.03	0.06	0.01
929	FSP_TSPYL2_1	chrX:53112052	AWKAVLVERGP	11	0.06	0.02	0.02
930	FSP_EFCAB5_1	chr17:28296061	NSLGIIWPKSGLILTA	16	0.06	0.02	0.01
931	FSP_ZMYM1_1	chr1:35578941	PWKNSESMKKVKCI	14	0.06	0.01	0.01
932	FSP_UGCG_1	chr9:114695180	IYIFCLHYGTQL	12	0.06	0.04	0
933	FSP_CENPF_1	chr1:214830653	FSKKARKQS	9	0.04	0.06	0
934	FSP_C7orf31_1	chr7:25200833	QNKKVMSMEMIL	12	0.06	0.01	0.01
935	FSP_E2F5_1	chr8:86114461	SQKTVSSGKV	10	0.06	0.02	0.01
936	FSP_SPRTN_1	chr1:231487256	YSKKAKERQN	10	0.06	0.04	0
937	FSP_APAF1_1	chr12:99071207	INKKTSRIFPA	11	0.06	0.01	0.01
938	FSP_TNMD_1	chrX:99854070	LNKMNSGWSLK	11	0.09	0.04	0.04
939	FSP_CNIH1_1	chr14:54896992	LAFFTTYMA	9	0.06	0.02	0.01
940	FSP_LTBP3_1	chr11:65314283	RSQGAGPVAT	10	0	0.06	0
941	FSP_WNT11_1	chr11:75905667	KVKKQDPKPIN	11	0.06	0	0
942	FSP_KLHL34_1	chrX:21675046	LVGGAGHGRW	10	0.06	0.01	0.01
943	FSP_AP1M1_1	chr19:16314384	SVSCGSNTTTCIWLPHPRRTRACRWSFLSSIRWCRCFPSTSRSWRRRASGTTLLSSTSCWTSSWTSATPRPPTARSCRSTSLRKATSWKQGPRGHQPPSPTRCPGGPKASSIGRMRCSWTSSSLSTSWVNTQEWDGWVTRSAPTAMSCAARSWAPSRCESSSRACPSCAWASTTRSSLTTRAAAKANPWSWRM	193	0.07	0.02	0
944	FSP_AP1M1_2	chr19:16314384	SSSLSTSWSAPTAMSC	16	0.07	0.02	0
945	FSP_ALDH1A3_1	chr15:101438350	RTPASCVRTLTWTWQWSVPIRECSSTKASVARQPPGCSWRSRSTLSLSGGAWSMPRNGPWETPSMSKQNRGLRLIKSSSTKS	82	0.07	0.02	0.01
946	FSP_PKP3_1	chr11:400077	SSSRTPRRQRSSTTPPASSGTSAQPLRPLARRCGSATGWWTPWSPLSTTPWTRANARTRAWRTRCASCGTCPTASTTRCRRPRCSGWRVAAAGTWRGRRRERSWAASRRRAGGCASCPSPPMRSPSRRCPRTPRASSGCGAPRSWGCTTGCCSAARPPGRCRTSRQATAGGRGC	174	0.06	0	0
947	FSP_CD79A_2	chr19:42383610	GPSWTWGRAPRTESSQPRGSSSCSARWCLGRCCCSGNDGRTRSSGWMPGMNMKMKTFMKA	60	0.06	0.01	0.04
948	FSP_PAK4_1	chr19:39663913	SLLVWPVGRNWQLAGPLTPTRGLTRTTHPGVPRGSLMTWPLTGHQRGAWPPGLPPEPEVPPALECWDPTPQSPSWPLQFLGPLAPAHHSGSHSEYPMSSSGLPCSWWWTQATPAPTWTTSSRLARAPRASCASPPCAARASWWPSRRWTCASSRGASCSSTRW	163	0.06	0	0
949	FSP_SF3B4_1	chr1:149895562	MDTLALHDPHPMATSGGLSLHPDPLPGHQFPLEAHFEALSLSKFTFSFLLLHFPNIFSIPWTNQRCCSSLGQRY	74	0.06	0.02	0.01
950	FSP_FER_1	chr5:108290522	NKETFWCERVMGNLVNMSFLYILMDRGDILSYNMLITCIDSRALGFQTFLNL	52	0.06	0.05	0.02
951	FSP_SH3KBP1_1	chrX:19560215	CHPLWEQLDTEPTPRLCSARKENQRWSLRPAARRPWRS	38	0.04	0.07	0.03
952	FSP_ASXL3_1	chr18:31319986	CYLHHWNYLSFLKGQIIREMSFHLLNYRTSNISHQWIRLHFQKALEIKHISKGVHRVG	58	0.04	0.07	0.03
953	FSP_FAM57B_1	chr16:30041821	WCSPDSSSSPRTRSSGCPSYAGRRPTQSLSQPGWCPLSRPSWPPLPATSSPPPASTSLMTNTGCPLPTRNLLCPCSSVTGTSTRSKGMEGTTERPEPRAARGP	103	0.07	0.05	0.01
954	FSP_DIAPH1_1	chr5:140953309	HLLPCLEKQECHLLLPLFLVVLESLHLLHFPEALAFLHLHPEWVCLHLPHLDLEFLQPQFCHLD	64	0.06	0	0.02
955	FSP_LRP2_1	chr2:169997025	HAGACTEEIAILMRLTSPNASVLAATPENIVKWRFQKASLQEQPQ	45	0.07	0.13	0.04
956	FSP_SLC25A17_1	chr22:41195058	WIQLDFDFRLMRKENPKLHTWCSWRSLKKKDSWHHIEGGFQ	41	0.07	0.05	0
957	FSP_SLC25A17_2	chr22:41195058	IQLDFDFREWLMCC	14	0.07	0.05	0
958	FSP_KIRREL2_1	chr19:36357214	ADFTEPGQAISPHPTLELSPATSNPHPLGPQIWPPGLPPSHMLPSPHLATRVSRLTCDIFPMEESWDLQLAIMDCSDF	78	0.09	0.11	0.01
959	FSP_TMEM132D_1	chr12:130184705	RWLPGGGSPWTSRRGPPWSSTTPCTQGVREGTASGKTRGEAMGSGQATVTSMSPGPPCRGSGASSFIRHTGNPP	74	0.09	0.06	0.01
960	FSP_RAB11FIP1_1	chr8:37728933	PQQRAPLVELKILARGSHSSRPGSHPRRHIQSQLSQALELGQPSTDFIL	49	0.06	0.02	0.02
961	FSP_ADGRF3_1	chr2:26534413	VGPKKGARHRWPVPAPLLSASASTSLPSPSSCPHTLFRKNPLWRC	45	0.06	0.02	0.02
962	FSP_PEAR1_1	chr1:156884483	ATMTHPRTATSLDIMTCLQYGIPHHLHFDARTVEEPGWYGRGQHTWLLLLKAGDRA	56	0.06	0.01	0.01
963	FSP_PLCB3_1	chr11:64032517	AQGSVMISSPASSQRWPPPRWMSSEVTRLWSSSGAGKSETCGSCARSISGRQSPSPAACWMAWLRHRLRAGAGCGQVP	78	0.06	0.01	0
964	FSP_ZNF880_1	chr19:52888438	NMREFILGRNRTDVMNVVRTSLEIQTWQIITESILERNRTDEMCVVRSLVIIHTLHSMR	59	0.09	0	0
965	FSP_YLPM1_1	chr14:75230947	LEIRQLSSKSLWRVGPKTRVLNSSKPPLSQIPLR	34	0.09	0.02	0.01
966	FSP_CARF_2	chr2:203848308	LWTIRNYLLHKLLKLFRIYNSGDF	24	0.06	0.05	0.04
967	FSP_NRG1_1	chr8:32453511	SQGSQNFALTKHHWLILESICAK	23	0.04	0.07	0.02
968	FSP_BAIAP2L1_1	chr7:97933623	HPTTWNACPWGQLPTGEQIRPGRHPPLRPQRPSPRPRLLTMPTGLQSRLFSAEKTPLPL	59	0.06	0	0.01
969	FSP_DHRS9_1	chr2:169948389	NSPFGSSCLQTSNNNMEKVTLKKV	24	0.09	0.06	0.01
970	FSP_DYRK3_1	chr1:206821441	ISFRVLASSWYASLPSPSCNLWMPSTKIRLFTAI	34	0	0.06	0.02
971	FSP_TAF1C_1	chr16:84213651	SLFLPGSTPSLHFLCWSLRSSGGCRSA	27	0.07	0.05	0.01
972	FSP_PAXIP1_1	chr7:154782740	LESLPAFLRCHLKTEVPCGLWLRSMGEIAS	30	0.06	0.01	0.02
973	FSP_FBXW7_1	chr4:153244156	VGELCGGSEPQTQSWCVQLGVGMGLKKPSCWCWTLMWT	38	0.06	0.02	0.01
974	FSP_CCDC37_1	chr3:126142183	RRRTPTAMGRNHSCTSRSPSSSWMSSESWRSRTCR	35	0.06	0.05	0.02
975	FSP_FGD1_1	chrX:54497148	HWSPSPLHHHAHCLPTPEWPRAWVLQQYPH	30	0.12	0	0
976	FSP_BCL9L_1	chr11:118770652	HHHRRAPGQGSATASPARCT	20	0.1	0.04	0.01
977	FSP_KLHL14_1	chr18:30349862	WSRSWRSSRCPCCGWSTTARPACSMRLTS	29	0.01	0.08	0
978	FSP_ZCRB1_1	chr12:42706971	NGNPVQESPQHQMIQDAQG	19	0.09	0.02	0.02
979	FSP_DNAH7_3	chr2:196801374	CPMMNFLRYYLRLKIPLGCNLT	22	0.07	0.04	0.01
980	FSP_ATAD2_2	chr8:124368685	LTKLMVWLQYGQAGKIRFTVLLFPPC	26	0.06	0.02	0.01
981	FSP_MEDAG_1	chr13:31480852	ASTSSVTASCASTTSRGMWN	20	0	0.11	0.01
982	FSP_NHLRC1_1	chr6:18122226	LARSSLSLEANSPYLGVWRPPLRMGLW	27	0.01	0.07	0
983	FSP_PROK2_1	chr3:71821968	LGGGCITLAHVCQAWPVYGLHLTDLFV	27	0.01	0.06	0.01
984	FSP_MOB1B_1	chr4:71844995	LSRNSTLLIEENLHHSKN	18	0.01	0.07	0.01
985	FSP_CCDC148_1	chr2:159077217	NTGPRKNRSGKKWK	14	0.03	0.06	0.02
986	FSP_SLC8A2_1	chr19:47969003	PPVWSRCGRRC	11	0.12	0.05	0.01
987	FSP_ZBED4_1	chr22:50277679	LSLPETALKQYACTV	15	0.09	0.02	0.01
988	FSP_TMTC3_1	chr12:88566417	QLDLLLPSEYYMFPAWGSVFW	21	0.06	0.01	0.01
989	FSP_ST18_1	chr8:53062482	SMKKIESWTSLHP	13	0.07	0.05	0.02
990	FSP_HECTD2_1	chr10:93247481	SLFRETQSNR	10	0.06	0.07	0.01
991	FSP_DNAH5_1	chr5:13766239	LTSSCGSWIAYCCCFKGKSVL	21	0.06	0	0.01
992	FSP_TAF1L_1	chr9:32633025	PFLPIQKAASGRG	13	0.03	0.06	0.01
993	FSP_ARHGEF17_1	chr11:73021527	SDAPLEALTGQGM	13	0.01	0.06	0.01
994	FSP_RASAL2_1	chr1:178412041	KKKKRTRIIM	10	0.04	0.06	0.01
995	FSP_GTF3C1_1	chr16:27509009	RMKKVIIKWA	10	0.07	0.05	0.01
996	FSP_PDE8A_1	chr15:85634360	INEKRLTCSIL	11	0.06	0.05	0.01
997	FSP_ITGAX_1	chr16:31373986	ATSTPGRLSSSPRCPGNGG	19	0.06	0.01	0
998	FSP_ZNF30_1	chr19:35435665	NVGRPLDTVQPLKCI	15	0.06	0.01	0.01
999	FSP_NCOA7_1	chr6:126176317	DEKKREKVIS	10	0.03	0.08	0
1000	FSP_KIF5B_1	chr10:32311826	SNKKWKKMKRS	11	0.06	0.01	0.02
1001	FSP_FAM135A_1	chr6:71235776	TMKKIVMY	8	0.07	0.04	0.02
1002	FSP_NWD2_1	chr4:37447379	GGGTQDSVWQACRKSQVPLLS	21	0.06	0	0
1003	FSP_RUNX2_1	chr6:45390355	FSPPPAACSPAK	12	0.06	0.04	0
1004	FSP_NR4A2_1	chr2:157185029	TVQKMQNTCV	10	0.07	0.02	0.01
1005	FSP_MAP4K5_1	chr14:50930796	NPKKDQLLKDF	11	0.06	0.01	0.01
1006	FSP_AKAP9_2	chr7:91732039	RMGGSQLSRI	10	0.01	0.06	0.01
1007	FSP_CNGA1_1	chr4:47939172	TNKKQLMRKKS	11	0.01	0.06	0
1008	FSP_ANKRD26_2	chr10:27329038	ELKKITVNYLQ	11	0.06	0.01	0.01
1009	FSP_RAB4A_1	chr1:229422305	FIEKNSKMTQIIQ	13	0.06	0.01	0
1010	FSP_SENP6_1	chr6:76423416	EAKEVFPKML	10	0.06	0	0.01
1011	FSP_PYGO2_1	chr1:154932028	RVLATHPQAT	10	0.01	0.06	0
1012	FSP_FAM155A_1	chr13:108518338	AAGGTGRR	8	0.01	0.06	0.01
1013	FSP_FOCAD_1	chr9:20912931	AQPGSGLETC	10	0	0.06	0
1014	FSP_FER1L6_1	chr8:125080031	KGKKAIQRQSQMR	13	0.09	0.08	0.01
1015	FSP_TRIO_1	chr5:14487781	CWSPLQPRARQRQTRCQVRPPPGPPCLPLAKRSRSPR	37	0.12	0.06	0
1016	FSP_SHC1_1	chr1:154942911	RRSCLPHQLHPWGPSCLLCLGTIVPLPCAPSSPG	34	0.06	0.08	0.05
1017	FSP_ATXN7_1	chr3:63981832	PGALLNPSRG	10	0.06	0.08	0.03
1018	FSP_PELP1_1	chr17:4575894	CHPHHPQVPHHPL	13	0.07	0.07	0.01
1019	FSP_KIF21A_1	chr12:39734129	LGLNMKRNSKP	11	0.09	0.06	0.01
1020	FSP_FAR2_1	chr12:29450110	EPKKSLIPLSG	11	0.09	0.05	0.02
1021	FSP_YIF1A_1	chr11:66055105	GWHWAFRKE	9	0.07	0.05	0.01
1022	FSP_YIF1A_2	chr11:66055105	GKTSTPLTSISPRWPSLLTCSWLGWHWAFRKGSPRRCWACVQAQRWCGW	49	0.07	0.05	0.01
1023	FSP_NPAT_1	chr11:108044069	VNFVKILMIQ	10	0.07	0.05	0.01
1024	FSP_IFFO1_1	chr12:6657974	GSGSAPCRRVRGPASPMGMRRRAQPSASTRRCSACSTS	38	0.12	0.01	0.01
1025	FSP_C6_1	chr5:41181560	ALSVYQFFIPQREVKISTIILPSNKPFKPLTKRILVLLGSIK	42	0.07	0.04	0.05
1026	FSP_ELAVL3_1	chr19:11577605	ARPARPCPTGHSLVQMEPLTTARPTSSSTTCPRT	34	0.13	0.11	0.1
1027	FSP_OGDH_1	chr7:44684936	ATRMPEPHRALPTRVPFP	18	0.07	0.04	0.04
1028	FSP_RERE_1	chr1:8716109	SLVMKGQIPVR	11	0.07	0.04	0.02
1029	FSP_SETDB2_1	chr13:50065970	YYKYVTNACL	10	0.03	0.07	0.01
1030	FSP_BTNL3_1	chr5:180432665	SLPPAPLLHE	10	0.09	0.02	0.01
1031	FSP_YY1_1	chr14:100728644	ILTMRQWLKNRSLERTHLLIIQNI	24	0.01	0.07	0.01
1032	FSP_PPP1R16A_1	chr8:145727027	TPWSTTRPTTPWLT	14	0.07	0.02	0.01
1033	FSP_CDHR3_1	chr7:105655642	LTIKITSTFIS	11	0.07	0.02	0.02
1034	FSP_CPZ_1	chr4:8616156	RRPCTHSGSTTRSHS	15	0.09	0.01	0
1035	FSP_NPHP1_1	chr2:110926098	VIEKNLMVGG	10	0.03	0.06	0.01
1036	FSP_PCF11_1	chr11:82877219	TAEKRIKMST	10	0.06	0.04	0
1037	FSP_GRINA_1	chr8:145065718	TPMDSHRSSQDKTLTHPSMETTRRRVPHPTMTTRTSLPPTGMTRASDRPSSARCS	55	0.01	0.06	0
1038	FSP_FAM151A_1	chr1:55081757	LSTVTTHWSSGWTLCWALPKRASNWTSRTSRQWAPPWTSCGS	42	0.09	0.04	0.01
1039	FSP_GIPC1_1	chr19:14593640	LPQPCGPASCSTPSWPMAVPTSRSCMARSPRPSACQLPR	39	0.06	0.02	0
1040	FSP_PAFAH1B1_1	chr17:2579802	VVNLGHSCCLDPETRLLRCGMSVLACAL	28	0	0.07	0.01
1041	FSP_TRIP12_1	chr2:230661315	LLHFLEKSPLEEWNQWVMHLCWH	23	0.09	0	0.01
1042	FSP_ZNF619_1	chr3:40529660	RISLFLGSHPFRARILCLTPCKPRSS	26	0.06	0.02	0
1043	FSP_RAB14_1	chr9:123954450	NLWLIVLTQLVLNLVQE	17	0.01	0.06	0.01
1044	FSP_PTGS1_1	chr9:125141077	PTTQHMTTSAGSLSPT	16	0.06	0.02	0
1045	FSP_CASP7_1	chr10:115481532	LLKRTIQMPPASPASS	16	0.06	0.02	0
1046	FSP_KIF20B_1	chr10:91514406	RERFLSNRMKWKY	13	0.06	0.02	0.01
1047	FSP_SLC26A7_2	chr8:92406218	KPIFLNRYLLQ	11	0.06	0.04	0.01
1048	FSP_DOPEY2_1	chr21:37605286	HNPFLASCRW	10	0.06	0.02	0.01
1049	FSP_PIGT_1	chr20:44050026	QCPSCMPSGT	10	0.01	0.06	0.01
1050	FSP_ARFGEF1_1	chr8:68128856	ETAPHLHLL	9	0.09	0.01	0
1051	FSP_FSTL4_1	chr5:132534817	PQWCGWVRYEGPRAEPWAKEHPLVLTLQPQAGTLYIFTDKSKNLYSLCGSTLVSLQVS	58	0.07	0.01	0.03
1052	FSP_DENND4A_1	chr15:65994675	CSQRRWIHLMRYATAFLCNSVDNMISQCLQFECFLKCRKLVLTPMPLLMVIIIRLFWKVPGLQEVVVAIFFGQK	74	0.06	0.01	0.01
1053	FSP_TCF20_1	chr22:42610948	RGAALAISMGVRVMWASFKHSTLALAVCHIISRITLGLSLQGVLSTNSSKSSS	53	0.07	0	0.02
1054	FSP_MAP1S_1	chr19:17836781	RRSCPTLRACANSWSTWLSLWSHRPPPGASSGWAGPAATSSLEASGMPPSSPSMASLCWSTVAQTPSPVSGSWCGTWTAWMPCW	84	0.06	0.01	0
1055	FSP_RP1_1	chr8:55538813	EKSVKEIKCFLTMNLNIAKVLLKTKVYFMYLTSLSKNPKIFMHRNLKQKWHLGI	54	0.07	0.05	0.01
1056	FSP_PCNXL2_1	chr1:233388513	RRKSWKMKSPVDTVLSKENQICKVKTILAPAPHALSLPRPQPFFRAIDKDR	51	0.07	0	0
1057	FSP_C1orf122_1	chr1:38274674	SRLSPPEAAFQRMLAMELRSPDHPRAEYPDFSPSPGPVAGL	41	0.06	0.02	0
1058	FSP_MFSD7_1	chr4:678571	PRPLPGLPAPPQRSSWMGSSCSSCGTRPMSSWLCAWGE	38	0.06	0.01	0
1059	FSP_MFSD7_2	chr4:678571	SWMGSSCSCGTRPMS	15	0.06	0.01	0
1060	FSP_STK31_1	chr7:23775341	NWILVNLFSGTSKAPFLCGGIDQTSQPSAGPRGT	34	0.06	0.01	0.01
1061	FSP_HELZ2_1	chr20:62193251	VGRSGWGVPASCTAAPPTSRWMSWQDCS	28	0.06	0.01	0.01
1062	FSP_LSP1_1	chr11:1902786	SAGVLRGSKRTGPACMPTKRRTVMKSTWRS	30	0.07	0	0
1063	FSP_AXDND1_1	chr1:179337955	IWWIVQNSFLLPFRMSSFPKKFFFL	25	0.06	0.01	0.02
1064	FSP_RGS2_1	chr1:192779369	ANSKLSSSLLLRKHSCGQKHLTSC	24	0.07	0	0
1065	FSP_AFP_1	chr4:74313372	ISSWQVLFMNIQEDILSLLSQ	21	0.07	0.02	0.02
1066	FSP_RRH_1	chr4:110756541	LEWQALDYSRSWLWTDT	17	0.07	0.04	0.01
1067	FSP_ESCO2_1	chr8:27634577	LLRQGKCQSAWS	12	0.06	0.01	0.01
1068	FSP_AP1G2_1	chr14:24032654	PRSYMPTLCAASTMPWQKTFPSNHWCRWQPGALGSMGTSCWQGTARRLSPFRWTKRKCWHCWKRCCSPTCPCQPLEDMPSQPS	83	0.06	0	0
1069	FSP_PHACTR2_1	chr6:144086414	QLALKHQLRHPLHPPHLVPKLQRRQFLAKQGQWGPPRAREKLTSSQ	46	0.06	0	0.02
1070	FSP_PRR12_1	chr19:50098808	HPVRPPPPNVRAWVGQQPPMPLGRPLGLEGQGARLIPPVSLKGFWDPRPTGKGLEGGRHRT	61	0.06	0	0.01
1071	FSP_SH3PXD2A_1	chr10:105363391	ASPRRPRRALRGPVRARTPRGSSSMRSLSMTSLHSALTQSLS	42	0.06	0	0.01
1072	FSP_ZNF469_2	chr16:88504852	EAPSTRAAPPSLRAARAHQRTGRQHPPPAKHSSSQCTQGRRWGAWHPGSWPVAQRMG	57	0.06	0	0
1073	FSP_FAM178B_1	chr2:97637864	RPWNSSTRGCCRPVGRPRPRGGWVWWAPRA	30	0.06	0	0.01
1074	FSP_HERC1_1	chr15:63986203	LTPVEKLRRKISELLLGNNMQPNSI	25	0.06	0	0.01
1075	FSP_TMEM25_1	chr11:118402960	LAPPDWPGIWMDSCRRPAPQDC	22	0.06	0	0.01
1076	FSP_AGXT_1	chr2:241808308	RPCSSCWGLVLPTCLLASWQPGGCR	25	0.06	0.09	0.02
1077	FSP_ZFP57_1	chr6:29641359	ATPVANVSAGAPTSIATSLFTIPS	24	0.06	0.05	0
1078	FSP_ARHGAP39_1	chr8:145773375	RPASSWCSPSRSVPSAS	17	0.06	0	0.01
1079	FSP_KCNC1_1	chr11:17794004	RSIFRGHRSWDLPIIVNLS	19	0.06	0.06	0.01
1080	FSP_R3HDM2_1	chr12:57704152	ESEKNWWKNL	10	0.07	0	0.01
1081	FSP_MIER3_1	chr5:56219767	DITITLELRTIWIV	14	0.06	0	0.01
1082	FSP_SLC7A10_1	chr19:33703794	PQPPGCCPWPA	11	0.07	0.05	0.02
1083	FSP_PPP2R2A_1	chr8:26221272	RSFFPKSSPLFRM	13	0.06	0	0
1084	FSP_AQP8_1	chr16:25232875	LLGGCSGLPWPRR	13	0.06	0.02	0.01
1085	FSP_AP5Z1_1	chr7:4830445	RCPPRWSPC	9	0.06	0	0
1086	FSP_SNX14_1	chr6:86275080	TLRFLHLS	8	0.06	0	0
1087	FSP_VASP_1	chr19:46025663	HPQVCPLRGSQLQRTEQGEDHPLHPLSRQHRALVVGELGPQAWPQLLLEPNSGKSASRRRPQGGPQPPKLRVVEAEVGDSWKR	83	0.06	0	0
